# Supplementary material for: Generation of genome-scale metabolic reconstructions for 773 members of the human gut microbiota
Source: Springer Nature journal article supplement (doi:10.1038/nbt.3703), 2016-11-28
Supplement: 41587_2017_BFnbt3703_MOESM2_ESM.pdf [file 41587_2017_BFnbt3703_MOESM2_ESM.pdf]

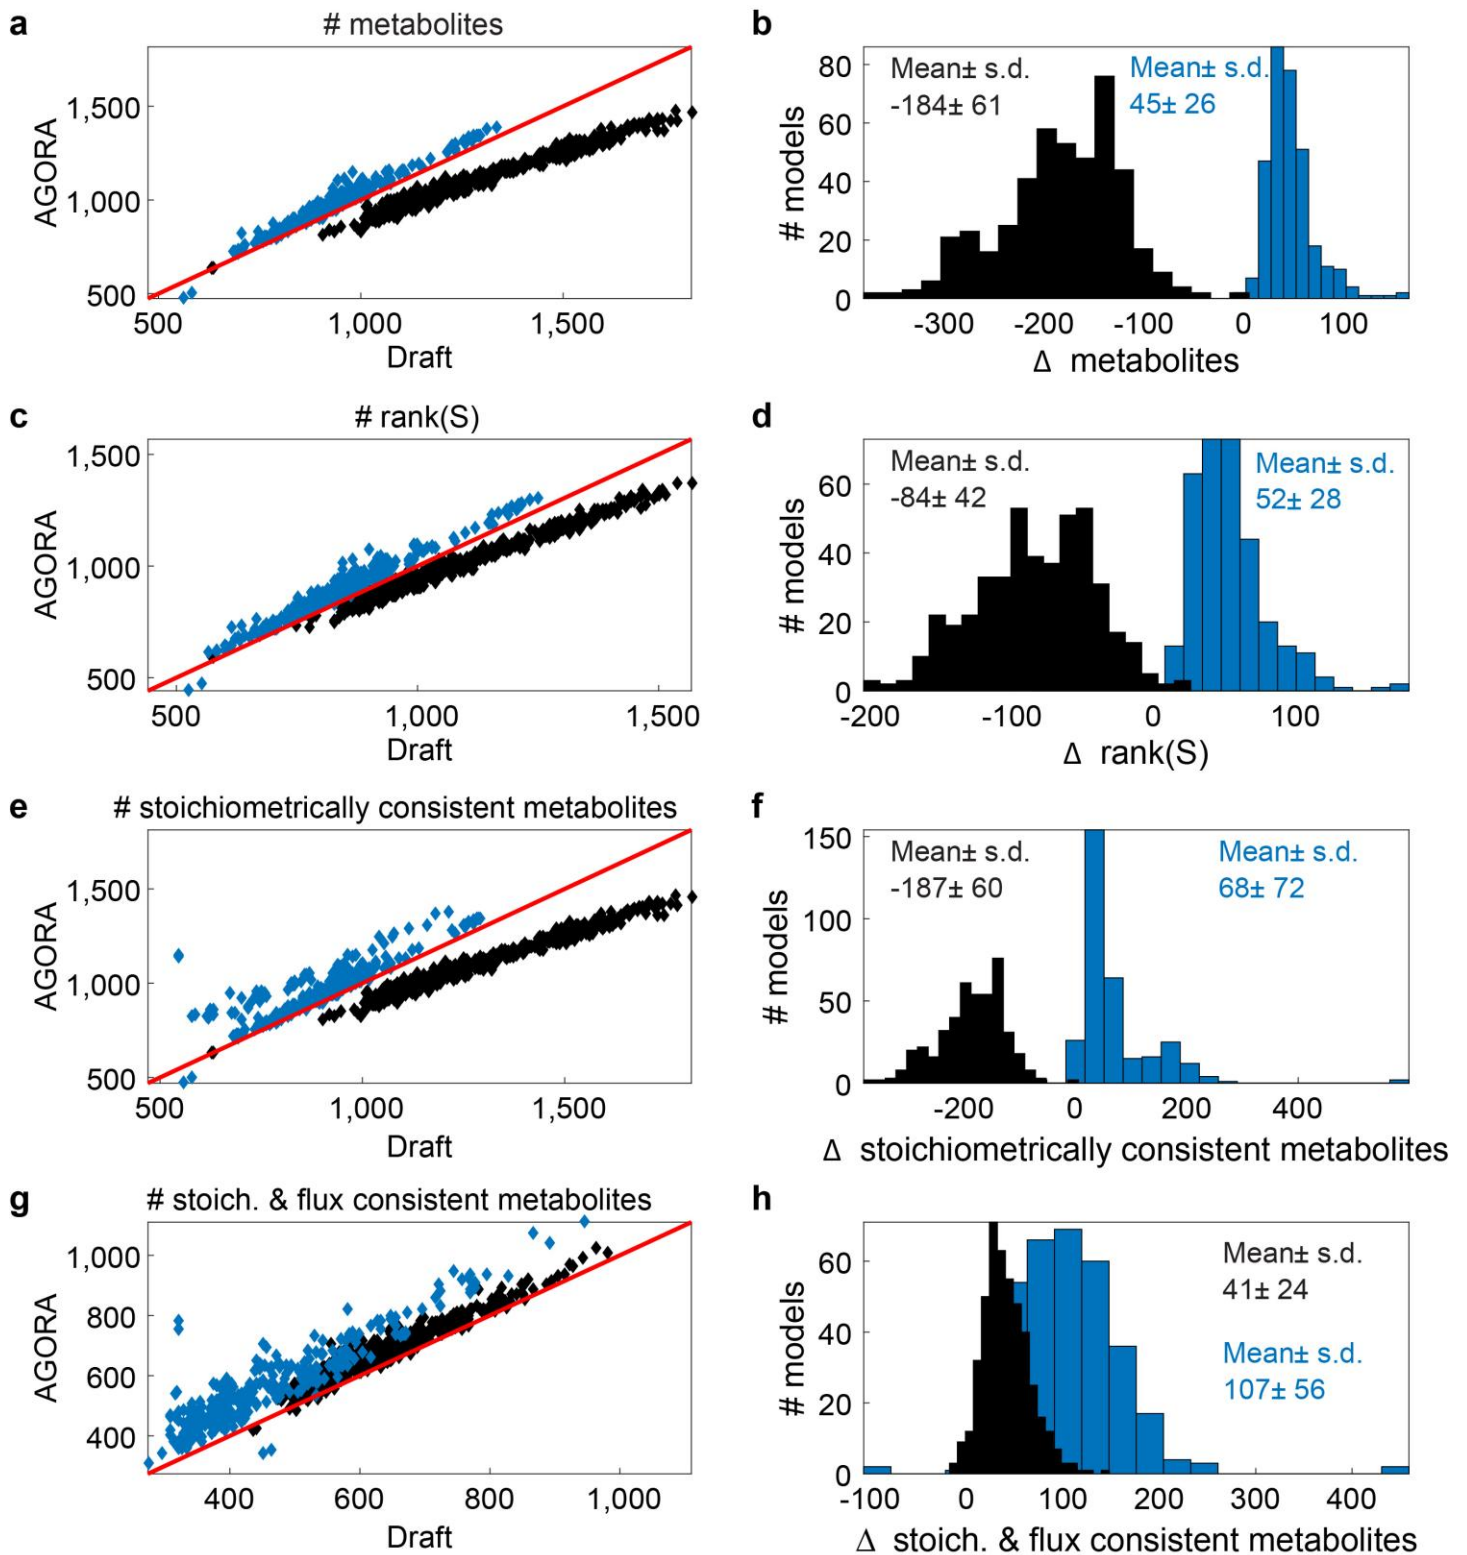

**Supplementary Figure 1**

Comparison of metabolite stoichiometric and flux consistency of draft and AGORA reconstructions.

Comparison of metabolite stoichiometric and flux consistency (Fleming, et al., J. Theor. Biol., 2016) of draft and AGORA

reconstructions (Supplementary Table 3). The figures highlight two groups in the draft reconstruction set. We identified the time of download as the key separating factor. Those reconstructions that have been obtained from Model SEED before summer 2015 had a smaller reaction (and metabolite) content, than those ones downloaded from model SEED or KBase afterwards. Model SEED/KBase updated and expanded their underlying database substantially in 2015 to include secondary metabolite, xenobiotics, and plant metabolism. Consequently, the average size of the draft reconstructions increased. These metabolic pathways were outside the scope of the current reconstruction effort and thus were not retained in AGORA reconstructions of the black group. Further experimental data and comparative genomic efforts will be required to establish that those out-of-scope reactions do indeed occur in the respective gut microbes. All reconstructions of the black group thus fall below the red line, meaning that the AGORA counterpart is smaller in terms of metabolites. *However, it is notable and thanks to the QC/QA effort applied to all AGORA reconstructions that there is no observable difference between the two groups when comparing the stoichiometric and flux consistent metabolites. In all cases, we improved the quality of the reconstructions when considering this measure over the draft reconstructions.*

(a) The number of metabolites in each AGORA reconstruction versus the corresponding draft reconstruction. The red line shows the line  $y=x$ , where the number of metabolites in the AGORA reconstruction is the same as the number of metabolites in the draft reconstruction. (b) Histograms showing the change in number of metabolites after the curation of the draft reconstructions of the two groups. The mean and standard deviation of the change in number of metabolites is shown for both groups. A similar separation was observed for (c-d) the rank of the draft and AGORA stoichiometric matrices and (e-f) the number of stoichiometrically consistent metabolites in AGORA versus the draft reconstructions. (g-h) In most organisms of both groups, the number of stoichiometrically and flux consistent metabolites was increased by the AGORA curation process.

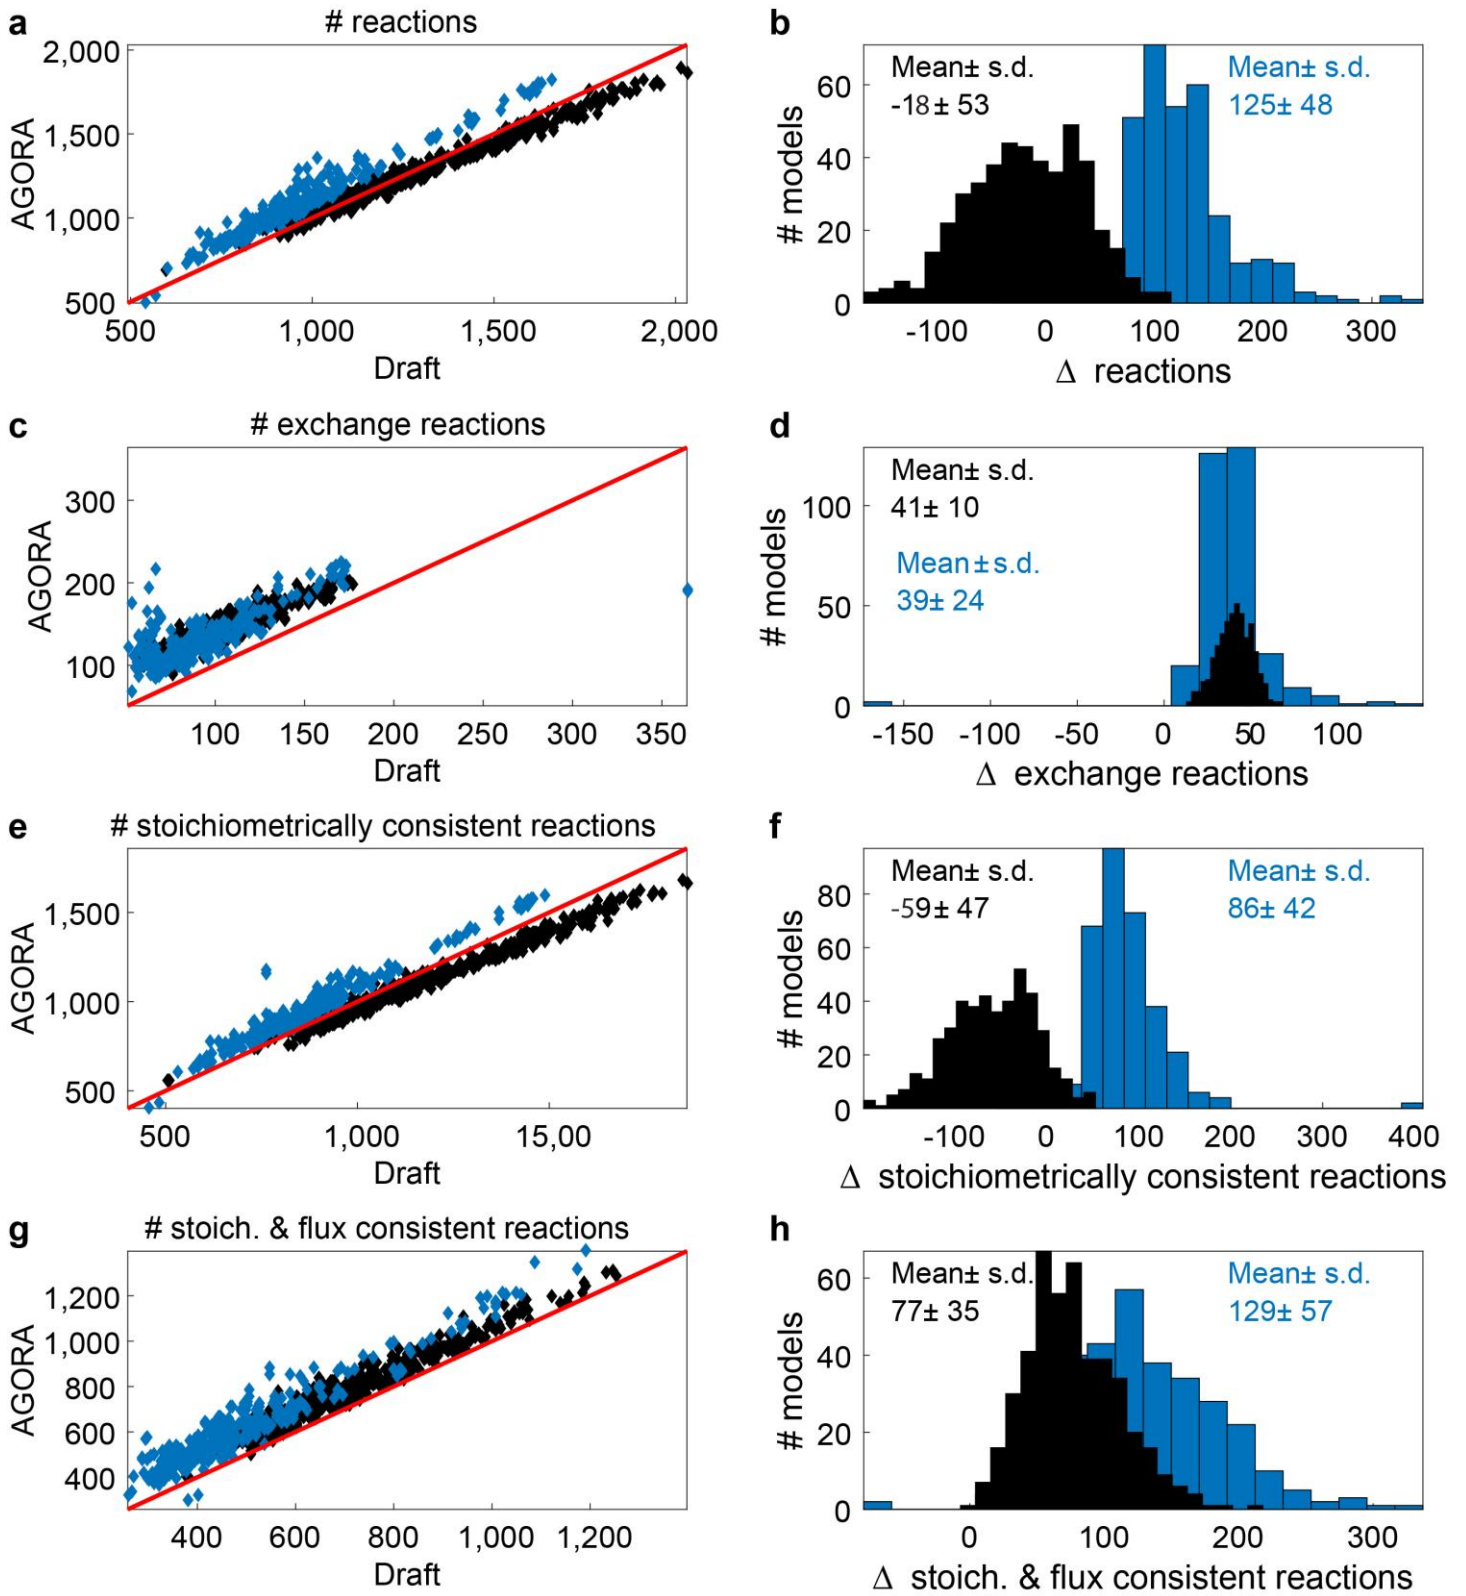

**Supplementary Figure 2**

Comparison of reaction stoichiometric and flux consistency of draft and AGORA reconstructions.

Comparison of reaction stoichiometric and flux consistency (Fleming, et al., J. Theor. Biol., 2016) of draft and AGORA reconstructions (Supplementary Table 3). The figures highlight two groups in the draft reconstruction set. We identified the time of download as the key separating factor. Those reconstructions that have been obtained from Model SEED before summer 2015 had a smaller reaction (and metabolite) content, than those ones downloaded from model SEED or KBase afterwards. Model SEED/KBase updated and expanded their underlying database substantially in 2015 to include secondary metabolite, xenobiotics, and plant metabolism. Consequently, the average size of the draft reconstructions increased. These metabolic pathways were outside the scope of the current reconstruction effort and thus were not retained in AGORA reconstructions of the black group. Further experimental data and comparative genomic efforts will be required to establish that those out-of-scope reactions do indeed occur in the respective gut microbes. All reconstructions of the black group thus fall below the red line, meaning that the AGORA counterpart is smaller in terms of reactions. *However, it is notable and thanks to the QC/QA effort applied to all AGORA reconstructions that there is no observable difference between the two groups when comparing the stoichiometric and flux consistent reactions. In all cases, we improved the quality of the reconstructions when considering this measure over the draft reconstructions.*

(a) The number of reactions in each AGORA reconstruction versus the corresponding draft reconstruction. The red line shows the line  $y=x$ , where the number of reactions in the AGORA reconstruction is the same as the number of metabolites in the draft reconstruction. (b) Histograms showing the change in number of reactions after the curation of the draft reconstructions of the two groups. The mean and standard deviation of the change in number of reactions is shown for both groups. A similar separation was observed for (c-d) the number of exchange reactions and (e-f) the number of stoichiometrically consistent reactions in AGORA versus the draft reconstructions. (g-h) In most organisms of both groups, reaction stoichiometric and flux consistency was improved by the AGORA curation process.

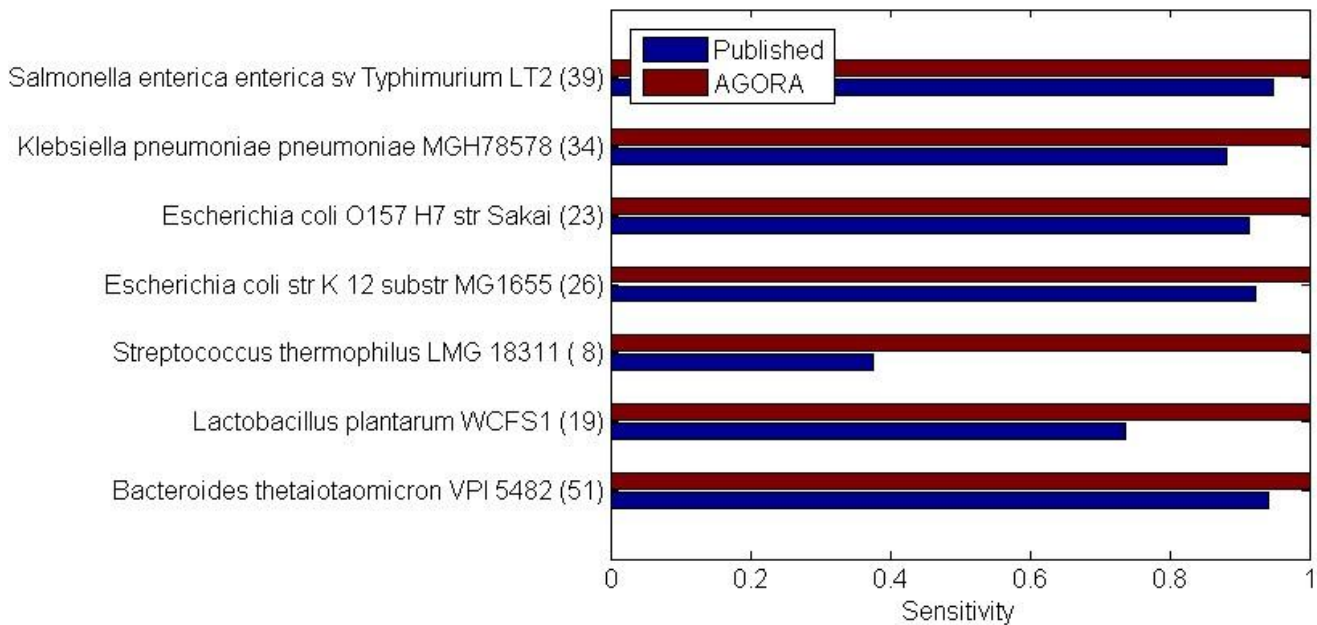

### Supplementary Figure 3

Sensitivity of carbon source uptake and fermentation product secretion of seven published models and the corresponding AGORA models.

In the parentheses are the number of carbon sources or fermentation products that the models should take up or secrete, respectively, according to data from literature (Supplementary Table 1). Uptake and secretion capabilities were determined using flux variability analysis. All exchange reactions had unlimited upper and lower bounds and a minimum flux of  $0.001 \text{ h}^{-1}$  through the biomass objective function enforced. The seven published models can be found in 1) Pastink et al., *Appl. Environ. Microbiol.*, 2009, 2) Teusink et al., *J. Biol. Chem.*, 2006, 3) Thiele et al., *BMC Syst. Biol.*, 2011, 4) Baumber et al., *BMC Syst. Biol.*, 2011, 5) Liao et al., *J. Bacteriol.*, 2011.

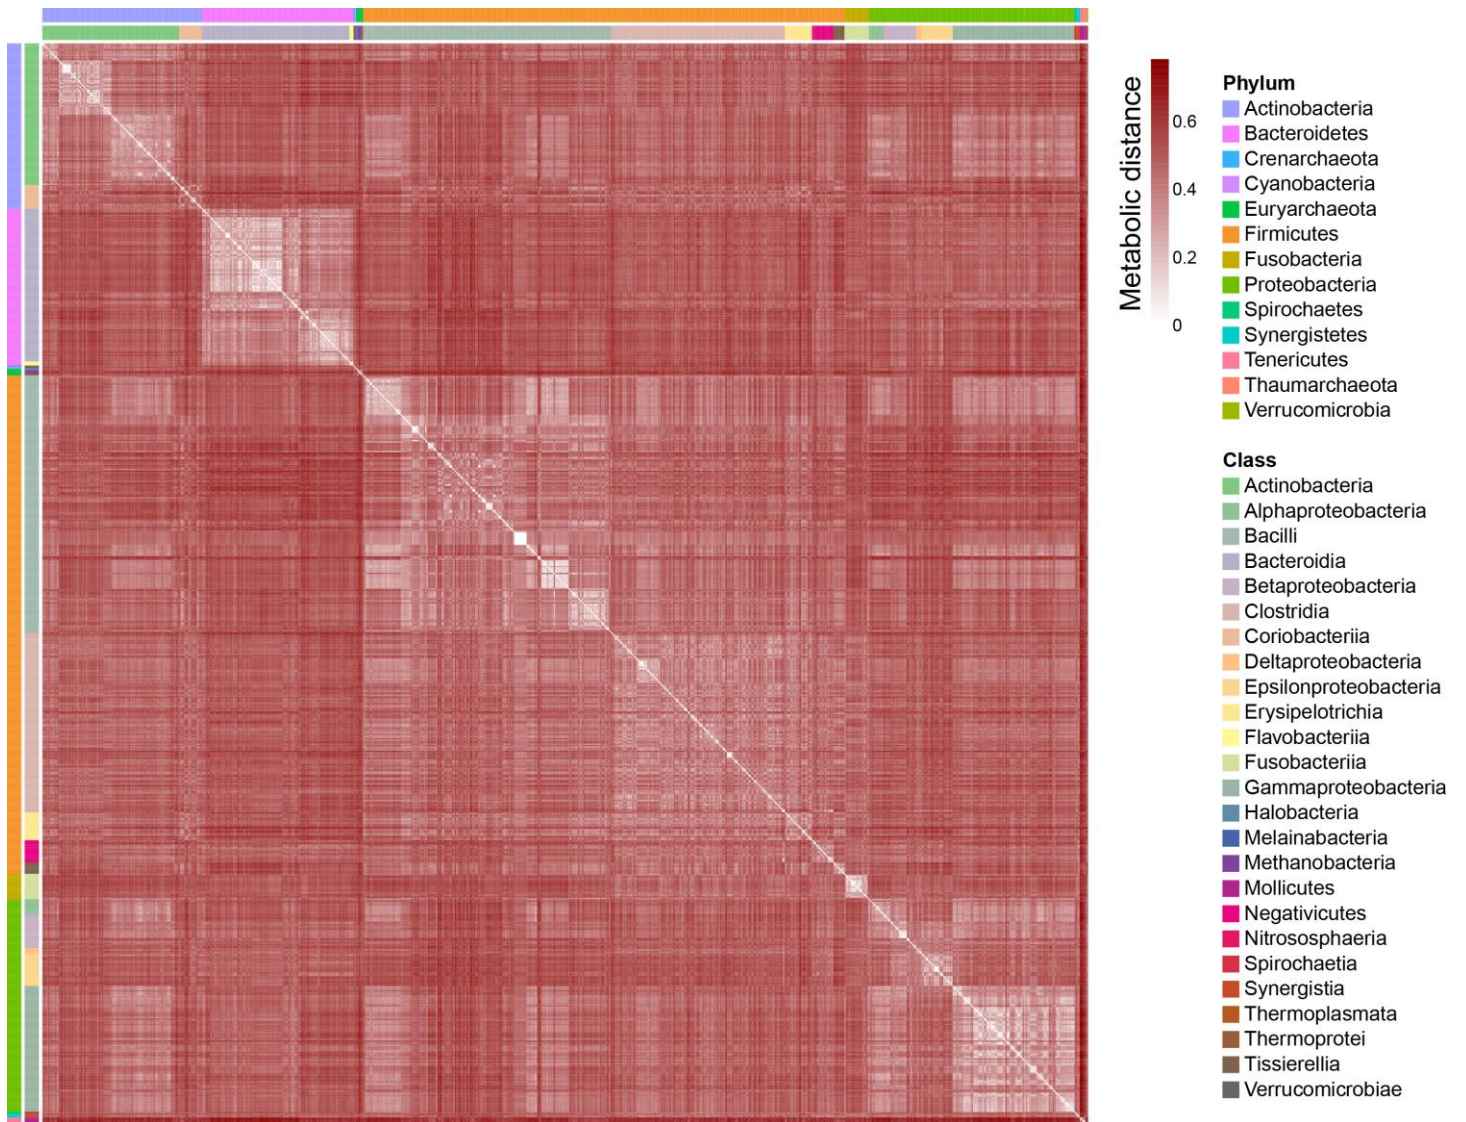

**Supplementary Figure 4**

Metabolic distances between the 773 AGORA reconstructions.

Reconstructions with identical reaction content have a metabolic distance of zero, while reconstructions having no overlap have a metabolic distance of 1 (Supplementary Table 9). Reconstructions are ordered based on phyla and taxonomic classes (Supplementary Table 5).

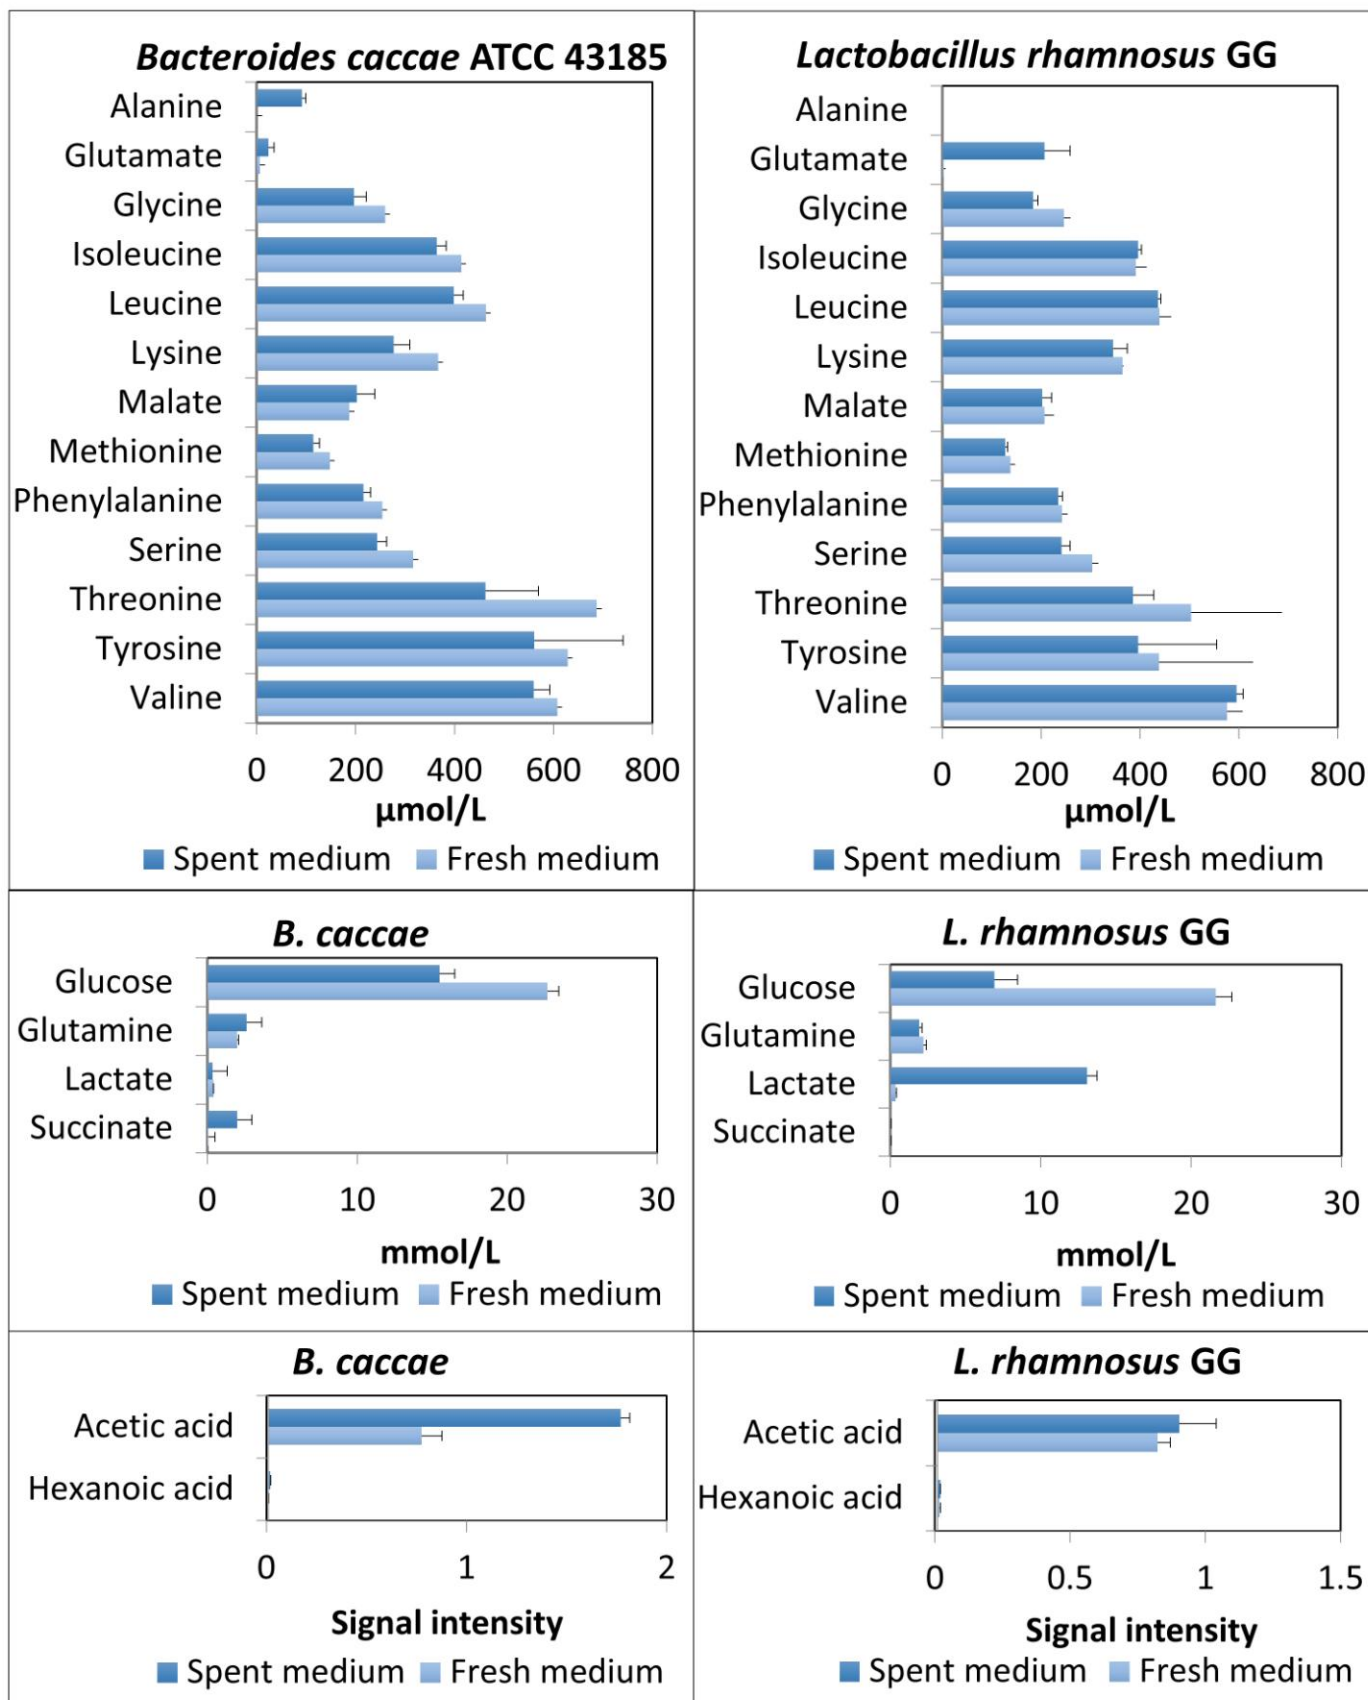

## Supplementary Figure 5

Metabolomic measurements for two bacterial strains grown *in vitro*.

Bar graphs showing the average metabolomic measurements determined for *Bacteroides caccae* ATCC 43185 and *Lactobacillus rhamnosus* GG ATCC 53103 during growth on DMEM 6429 medium supplemented with arabinogalactan (Supplementary Note 3). Error bars show the standard deviation. Statistically significant uptake and secreted is shown and compared with *in silico* predictions in Fig. 4a.





## Supplementary Figure 6

Clustering of the ratio of pairwise interaction types on the genus level per growth condition.

The growth of all AGORA microbe pairs (298,378 pairs) was simulated under four different conditions; using either Western diet or a high fiber diet (Supplementary Table 12) with and without oxygen. Depending on whether each microbe grew faster or slower in the co-culture simulation compared with by itself under the same condition (Supplementary Tables 6 and 9), the interaction between the two microbes was categorized as i) mutualism: both microbes grow faster, ii) commensalism: one microbe grows faster (Taker) while the other's growth rate is not affected (Giver), iii) neutralism: neither microbe's growth rate is affected, iv) amensalism: one microbe grows slower (Affected) while the other's growth rate is not affected (Unaffected), v) parasitism: one microbe grows faster (Taker) while the other grows slower (Giver), and vi) competition: both microbes grow slower. The heatmap shows the ratio of microbes per genus that have each interaction type per condition, e.g., the cell in the first row and first column shows that about 40% of microbes belonging to the *Parvimonas* genus have the interaction type "ParasitismTaker" on Western diet under anaerobic conditions.

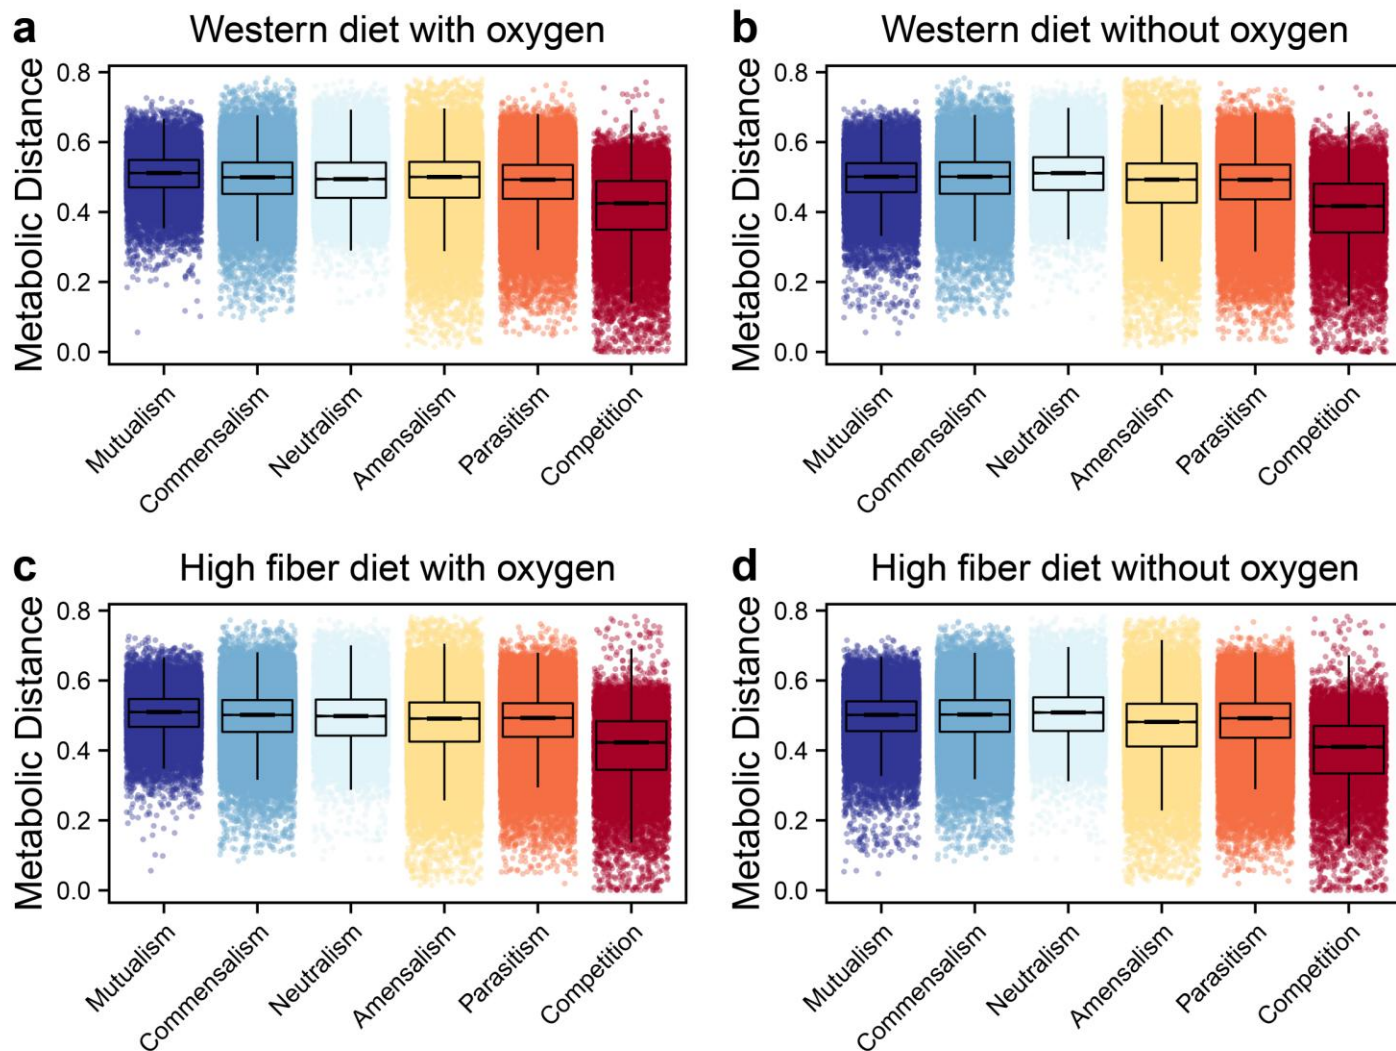

**Supplementary Figure 7**

Metabolic distances plotted by the six types of interactions between the 298,378 microbe-microbe pairs by diet.

The growth of all AGORA microbe pairs (298,378 pairs) was simulated under four different conditions; using either Western diet or a high fiber diet (Supplementary Table 12) with and without oxygen. Depending on whether each microbe grew faster or slower in the co-culture simulation compared with by itself under the same condition (Supplementary Tables 6 and 9), the interaction between the two microbes was categorized as: mutualism (both microbes grow faster), commensalism (one microbe grows faster while the other's growth rate is not affected), neutralism (neither microbe's growth rate is affected), amensalism (one microbe grows slower while the other's growth rate is not affected), parasitism (one microbe grows faster while the other grows slower), and competition (both microbes grow slower). Based on the Jaccard index between the reaction content of the reconstructions of the two microbes, the metabolic distance between them was calculated (Online Methods, Supplementary Table 9). Reconstructions with identical reaction content have a metabolic distance of zero, whereas reconstructions sharing no reactions have a metabolic distance of 1.

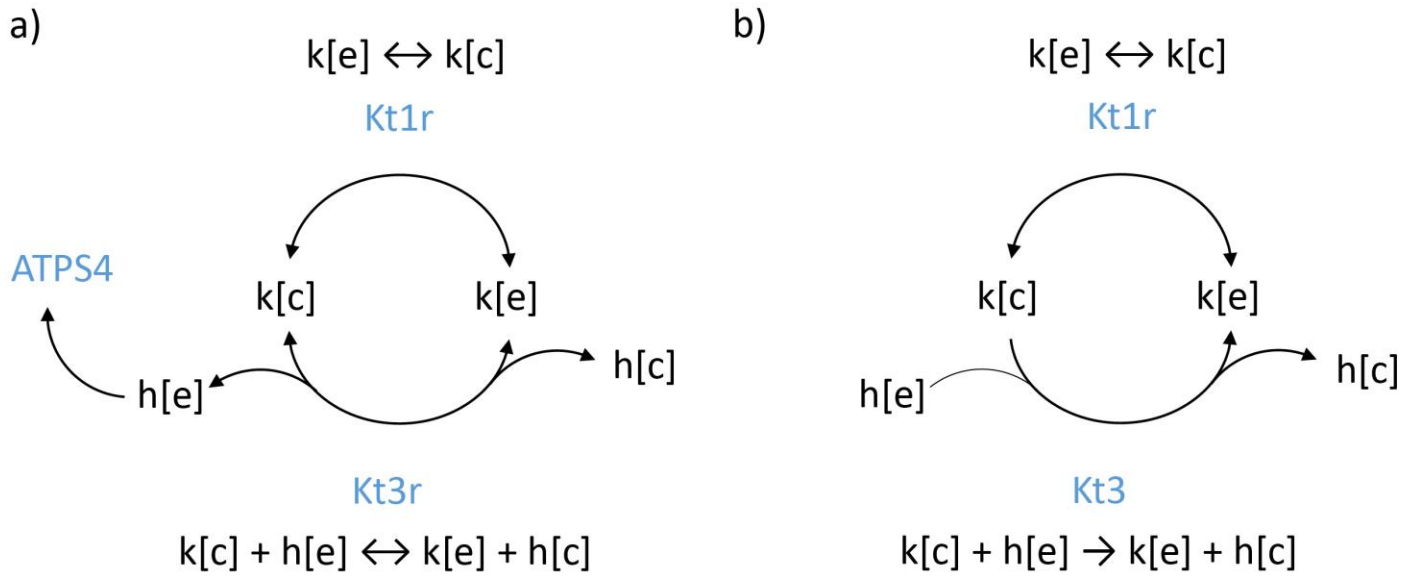

### Supplementary Figure 8

Example of a typical futile cycle resolved during curation.

a) When the ATP demand reaction is optimized, flux in the reverse direction through the potassium uniporter (Kt1r) and the potassium antiporter (Kt3r) leads to an unfeasibly high secretion flux of proton into the extracellular space. This leads to a corresponding flux through the ATP synthase (ATPS4), resulting in unfeasible ATP production. b) The futile cycle is resolved by replacing Kt3r with the irreversible version Kt3. This prevents infeasible ATP production while still allowing potassium transport in both directions.

### **Supplementary Note 1. Description of QC/QA and data-driven curation efforts.**

We have compared and evaluated the predictive accuracy of AGORA against numerous resources, including genome-scale single gene deletion data (Fig. 1d), which are generally accepted as gold standard for the evaluation of the predictive potential of microbial metabolic models. The resources, which we used to assess and demonstrate the prediction accuracy, include (i) Genome-scale gene essentiality data (taken from <http://www.essentialgene.org/>). (ii) Experimental data on the utilization of all main groups of carbon sources. (iii) Experimental data on the major fermentation pathways in the human gut microbiota. (iv) Experimentally determined defined media/ nutrient requirements. The latter three data have been collected from more than 170 primary research papers (Supplementary Table 1) and the books: “Bergey’s manual of systematic bacteriology” and “The prokaryotes: a handbook on the biology of bacteria”. As such, we demonstrated the predictive sensitivity of AGORA using information generally accepted as gold standards by the field. The results can be found in Figures 1 and 3 in the main text, Supplementary Table 4, and Supplementary Fig. 3. We would like to highlight that inter-organism propagations were performed on the species level and in limited cases on the genus level. Hence, the metabolic functions were not inferred from distant organisms. It is to be noted that molecular systems biology is characterized by an iterative cycle of model predictions and experimental validation. It is natural in such a process for either prediction or validation to be one step ahead of the other. Compared to other biological domains, our experimental knowledge of the gut microbiome lags behind. Genome-scale models, such as those in AGORA, can be used to provide novel insight into the biology of the considered gut microbe and to drive the design of experimental projects.

Reaction directionality was propagated from biochemically curated reactions in the VMH database (<http://vmh.life>) and each was checked for consistency with thermodynamic estimates of maximum and minimum standard transformed Gibbs energy for each reaction using our state of the art Component Contribution method<sup>1</sup>. As documented on the VMH database, the following conditions were assumed: (i) temperature 310.15K; (ii) cytosol pH 7.2, extracellular pH 7.4; (iii) ionic strength 0.15 mol/L; (iv) 30 mV electrical potential difference between extracellular space and cytosol; and (v) minimum and maximum concentration range from 1e-7 to 1e-2 mol/L. The transformed Gibbs energy of formation of a metabolite is the sum of standard transformed Gibbs energy of formation and an  $RT\log(x)$  term, where R is the gas constant, T is temperature and x is the absolute concentration of the metabolite. Note using this approach, the activity coefficient is absorbed into the standard transformed Gibbs energy of formation. If we assume that the conditions above do vary, let us consider them one by one. (i) Temperature varies only slightly, and there are not enough enthalpic data to make a temperature adjustment beyond what we do. (ii) Our choice of pH 7.4 is representative of the terminal ileum. According to Fallingborg J.<sup>2</sup> “The intraluminal pH is rapidly changed from highly acid in the stomach to about pH 6 in the duodenum. The pH gradually increases in the small intestine from pH 6 to about pH 7.4 in the terminal ileum. The pH drops to 5.7 in the caecum, but again gradually increases, reaching pH 6.7 in the rectum.” This slight variation in small and large intestinal pH might change the direction of some cytoplasmic transport reactions. (iii) The ionic strength is not known accurately, for any cell. We use 0.15 mol/L as is standard in the biochemical thermodynamic literature. Experimental evidence would be required to justify the use of a different value. (iv)

The electrical potential difference between extracellular space and cytosol could indeed vary, however, then one would be modeling the same organism in two different conditions so one would expect the model predictions to be different. (v) There is insufficient data on the absolute concentrations of the metabolome in the cytoplasm in any cell. With gut microbial species, the paucity of data is even more acute. Without further data, one could not safely assume a tighter concentration range.

## Supplementary Note 2. Comparison with published reconstructions.

We compared all 3,192 unique reactions included in the 773 AGORA reconstructions with the 4,608 unique reactions included in 11 published gut microbe reconstructions previously used to simulate a model gut community<sup>3</sup> after unifying the reaction namespaces. Additionally, the reconstructions of eight strains in AGORA overlapped with published reconstructed strains<sup>4-10</sup> and were compared against each other directly. Subsystems were assigned to every reaction in the AGORA and the published reconstructions based on the subsystem nomenclature in Recon 2<sup>11</sup>. The results are shown in Supplementary Tables 7-8.

Between 310 and 1,058 (mean  $682 \pm 290$ ) reactions overlapped between the respective AGORA and published reconstructions. Between 305 and 934 (mean  $770 \pm 227$ ) reactions were unique to the curated reconstructions, and between 229 and 1,776 (mean  $956 \pm 678$ ) reactions were unique to the published reconstructions (Supplementary Table 7). Most of the reactions that were unique to the published reconstructions belonged to exchange and transport subsystems, particularly for *Escherichia coli* K-12 substr. MG1655, *Escherichia coli* O157H7 substr. Sakai, *Klebsiella pneumoniae* MGH78578, and *Salmonella enterica* sv. typhimurium LT-2 (Supplementary Table 8). These reconstructions used the *Escherichia coli* reconstruction iAF1260<sup>12</sup> as a template, which includes a periplasm compartment. Thus, the majority of reaction content unique to these reconstructions could be attributed to the presence of the additional periplasm compartment, which requires additional transport reactions. For example, the *Escherichia coli* K-12 substr. MG1655 reconstruction iEco1339\_MG1655<sup>9</sup> contains 1,573 reactions not found in the AGORA reconstruction. Of those, 913 reactions take place in the periplasmic compartment. Of the 934 reactions found only in the AGORA *Escherichia coli* K-12 substr. MG1655 reconstruction, 197 are cytosolic versions of reactions that take place in the periplasm in the published reconstruction. Another major reason for discrepancies between the AGORA and published reconstruction was the captured cell wall and lipopolysaccharide biosynthesis pathways. Cell wall and lipopolysaccharide structures are species-specific and generally poorly annotated, and hence difficult to curate. Consequently, between 30 and 299 reactions from cell wall and lipopolysaccharide biosynthesis were unique to the published reconstructions (Supplementary Table 8). Curating for cell wall and lipopolysaccharides structures and including accurate transport mechanisms would require experimental data, which is not available for most AGORA organisms. Thus, these curation steps were not performed in the present study, with the exception of reconstructions from two genera, *Mycoplasma* and *Ureoplasma* (Online Methods).

At the same time, 161 reactions from cell wall and lipopolysaccharide biosynthesis were present in the *E. coli* draft reconstruction, and thus also present in its AGORA version, but not in the published reconstruction iEco1339\_MG1655 (Supplementary Table 8). These reactions are involved in fatty acid biosynthesis, as the ones catalyzed by the 3-oxoacyl-acyl-carrier-protein reductase. Since the presence of these enzymes in *E. coli* is supported by genome annotation, these reactions should also be included in the published reconstruction. Another example is dipeptide degradation, which is supported by genome annotation in the AGORA reconstruction but is absent from the published *E. coli* reconstruction.

The eight AGORA reconstructions had on average a higher number of blocked reactions than the respective published reconstructions (31 +/- 9 % compared with 13 +/- 6 %). This was mainly due to the deletion of reactions that were added during the automated gap-filling step of the draft reconstructing pipelines and were found to no longer be required for biomass production. Since the presence of these reactions is not supported by gene annotation or experimental data, corresponding to a confidence score of 1<sup>13</sup>, their inclusion is hypothetical.

Another cause for blocked reactions in AGORA reconstructions was the adjustment of reaction reversibilities to VMH standards. This led to some pathways that were carrying flux in an infeasible direction in the draft reconstructions to be blocked in the resulting AGORA reconstructions. For example, the vitamin B12 biosynthesis pathway was reversible in many draft reconstructions and often allowed to produce downstream biomass precursors from cobalamin. Making this pathway irreversible caused it to be blocked in many reconstructions due to missing steps, in agreement with many microbes being unable to synthesize cobalamin<sup>14</sup> (Supplementary Table 18). Nonetheless, the QC/QA curation effort led to an increase of the overall stoichiometric and flux-consistent reactions in the AGORA reconstructions compared to the draft reconstructions (Fig. 1, Supplementary Figs. 1-2).

### **Supplementary Note 3. *In vitro* cell cultures and cell counting.**

***In vitro cell culture:*** Pre-cultures of *Bacteroides caccae* ATCC 43185 (*B. caccae*) and *Lactobacillus rhamnosus* GG ATCC 53103 (LGG) were prepared using Brain Heart Infusion Broth (BHIS; Sigma) supplemented with 1% hemin. The pre-cultures were run for 20 hours under anaerobic conditions and while shaking at 37 °C. The volume of the cell suspension was adjusted to a maximum optical density (OD) at 600 nm of 0.8 using sterile 0.9% w/v NaCl solution to obtain reliable OD measurements. Following pre-culturing, centrifugation was carried out at 4,700 x g for 10 min at room temperature. The resulting cell pellets were washed twice in 0.9% w/v NaCl solution and subsequently resuspended in 10 ml of 0.9% w/v NaCl solution. Subsequently, 1 ml of the cell suspensions were inoculated in DMEM 6429 supplemented with 1% hemin and 3.33% vitamin with a starting OD of 0.1 and K maintained under anaerobic conditions. Culture was carried out in media with or without the addition of arabinogalactan (Sigma; 9.4 g/l). *B. caccae* and LGG were cultured for 33 and 44 hours of culture for *B. caccae* and LGG, respectively. Cells were harvested for cell counting by centrifugation (4,700 g) and 750 µL aliquots of supernatant were removed for subsequent metabolite extraction. The aliquots were snap-frozen and placed at -80 °C until analysis. The measured ODs and pH values are listed in Supplementary Table 10.

**Cell counting:** Bacterial pellets were thawed and subsequently stained with the Texas Red<sup>®</sup>-X dye-labeled Wheat Germ Agglutinin component which selectively binds to the surface of gram-positive bacteria, effectively distinguishing them from gram-negative bacteria. Cells were washed, resuspended in sterile 0.9% w/v NaCl solution and quantified by flow cytometry (BD Fortessa) using negative beads (Thermo Fischer) as a standard for the volume of suspension. The resulting data were analyzed using the DIVA 8.0.1 software (BD Biosciences). The cell counts are shown in Supplementary Table 10.

**Real-time PCR (RT-PCR):** The presence of *B. caccae* cells in the cultures were validated using qPCR. Microbial genomic DNA was extracted using the PowerSoil DNA Isolation Kit from MoBio accordingly to the manufacturer's protocol. qPCR was performed using *B. caccae*-specific primers (Eurogentec). The *B. caccae*-specific primers were 5'-CCC GGA GTT GGA AAA CAA TG-3' (forward) and 3'-CCT CTT CAG AAA TGA GCT TTT GC-3' (reverse). 5 ng of DNA were used in a 20 µl PCR reaction mixture containing 10 µl iQ<sup>™</sup> SYBR<sup>®</sup> Green Supermix (Bio-Rad) and 500 nM of each primer. PCR amplifications were performed on a LightCycler<sup>®</sup> 480 Instrument (40 cycles at 95°C for 10 sec and 55°C for 20 sec; Roche).

#### **Supplementary Note 4. Fermentation and carbon source utilization pathways captured by AGORA.**

A thorough literature search was performed for the reconstruction of the main fermentation pathways in the human gut and their distribution across phyla. The main products of carbohydrate and protein fermentation by the human gut microbiota are the short-chain fatty acids (SCFAs) acetate, propionate, and butyrate<sup>15</sup>. The different routes leading to these products were reconstructed for all AGORA organisms reported to carry these pathways and are briefly described below.

Acetate is produced via the widespread acetate kinase<sup>16</sup>. Moreover, bacteria in the *Bifidobacterium* genus produce acetate via the bifid shunt<sup>16</sup>, and the genera *Blautia* and *Marvinbryantia* convert CO<sub>2</sub> and hydrogen to acetate via acetogenesis<sup>17</sup>. Three pathways exist for the conversion of carbohydrates and amino acids to propionate, with succinate, propane-1,2-diol, and lactate, respectively, as intermediates<sup>18</sup>. Their distribution in the human gut microbiota has been analyzed by comparative genomics and experimentally validated<sup>18</sup>. Carbohydrate and amino acid fermentation to butyrate is carried out via five routes, with acetyl-CoA, glutarate, lysine, 4-aminobutyrate, and succinate, respectively, as intermediates<sup>19</sup>. A genomic analysis of their distribution across several phyla has been performed<sup>19</sup>. Moreover, gut microbes produce lactate, formate, butanol, acetoin, 2,3-butanediol, and ethanol, as well as carbon dioxide and hydrogen<sup>16</sup>. For most gut microbes, the capabilities to produce these acids and gases are well-described in the literature<sup>16</sup>. Produced hydrogen is cross-fed to other species in three ways: methanogenesis by archaeal representatives resulting in methane production<sup>20</sup>, dissimilatory sulfate reduction to sulfide<sup>21</sup>, and acetogenesis yielding acetate<sup>17</sup>. Amino acid fermentation results in the production of not only SCFAs and gases, but also the branched-chain fatty acids isobutyrate and isovalerate, as well as phenols (e.g., phenylacetate) and indoles<sup>15, 22</sup>. The



pathways described above, resulting in 16 fermentation products and two gases in total, were included in the respective AGORA reconstructions.

The available literature was also searched for the utilization of carbon sources by AGORA organisms. The gut microbiota utilizes a variety of diet- and host-derived carbon sources, including simple sugars, starch, fiber, host-derived polysaccharides, protein, and organic acids<sup>23</sup>. The potential to exploit carbon sources is species-specific. While the ability to utilize mono- and disaccharides is widely spread<sup>16</sup>, the capability to break down diet- and host-derived polysaccharides is limited to certain genera, e.g., *Bacteroides*, *Bifidobacterium*, *Roseburia*, and *Ruminococcus*<sup>24</sup>. Some species utilize amino acids as carbon and energy sources, e.g., *Clostridium difficile*, *Pseudomonas aeruginosa*, and *Porphyromonas gingivalis*<sup>16</sup>, and some utilize intermediates of central metabolism and organic acids, e.g., *Bacillus cereus*, *Citrobacter* sp., *Oxalobacter formigenes*, and *Veillonella* sp.<sup>16</sup>. A thorough literature search was performed for the distribution of these four groups of carbon sources utilized by the AGORA organisms: (i) simple sugars and oligosaccharides, (ii) polysaccharides and fibers, (iii) amino acids, and (iv) organic acids and other metabolic intermediates. In total, information on the utilization of 95 carbon sources was gathered and the corresponding pathways were included in the respective AGORA reconstructions.

### **Supplementary Note 5. Definition of sub-pathways.**

A sub-pathway was determined as any set of reactions that converts an initial substrate of the pathway into the final product(s) of the pathway. For example, the biosynthesis of a purine nucleotide has one initial substrate, phosphoribosyl pyrophosphate, and two final products, AMP and GMP. Thus, this pathway includes two sub-pathways. A sub-pathway was considered complete if all genes required for all the reactions in the sub-pathway were present in the subsystem. A sub-pathway was gap-filled if the length of a gap in the pathway did not exceed one reaction. In this case, the gaps were filled by reactions not associated with GPRs. Sub-pathways with gaps longer than one reaction were considered incomplete and reactions for these sub-pathways were not included in reconstructions. These criteria were applied to all the reconstructed pathways except the citric acid cycle, because the presence of an incomplete citric acid cycle has been confirmed for multiple microbial genomes<sup>25</sup>. These incomplete versions of the citric acid cycle are used for the biosynthesis of various compounds, such as fatty and amino acids<sup>25</sup>. Thus, no gap-filling was performed for the citric acid cycle and reactions for this pathway were included in the reconstructions regardless of the pathway's completeness in the genome.

### **Supplementary Note 6. Curation of respiration and quinone biosynthesis in AGORA.**

The genomes of the reconstructed gut bacteria contain multiple aerobic reductases as well as anaerobic reductases for tetrathionate, thiosulfate, polysulfide, sulfite, adenylyl sulfate, heterodisulfides, fumarate, trimethylamine N-oxide, dimethyl sulfoxide, nitrate, nitrite, nitrogen oxide, nitrous oxide, selenate, and arsenate<sup>26</sup>. Nonetheless, the reactions for reduction of respiratory electron acceptors should include two half-reactions, one for a reduction of the electron acceptor itself and another for an oxidation of the corresponding quinone. Since the

repertoire of synthesized quinones varies among bacterial taxa<sup>27</sup> and quinones demonstrate specificity for their electron acceptors<sup>28</sup>, the inclusion of respiratory reactions into the models was preceded by the reconstruction of the quinone biosynthetic pathways.

In bacteria, one pathway has been described for ubiquinone (UQ) biosynthesis. For menaquinone (MK) biosynthesis, two different pathways are known, the first one through O-succinylbenzoate and the second one through futasolone<sup>27</sup>. The last steps of MK biosynthesis through futasolone are unknown, but are proposed to be catalyzed by a polyprenyltransferase, a carboxy-lyase, and a methyltransferase<sup>29</sup>. All three steps of polyprenylation, carboxyl elimination, and methylation are present also in UQ biosynthesis and in MK biosynthesis O-succinylbenzoate biosynthesis in the same order as listed above. So, we proposed that this reaction mechanism should be conserved in MK through futasolone biosynthesis. Thus, in analogy with the corresponding steps in the UQ and MK via O-succinylbenzoate biosynthesis pathways, we predicted the three last steps of the MK through futasolone pathway in the analyzed genomes:

- 1) Polyprenyltransferase  
 $1,4\text{-dihydroxy-6-naphthoate} + \text{polyprenyl-pyrophosphate} \rightarrow 3\text{-polyprenyl-1,4-dihydroxy-6-naphthoate} + \text{pyrophosphate}$
- 2) Carboxy-lyase  
 $3\text{-polyprenyl-1,4-dihydroxy-6-naphthoate} \rightarrow 2\text{-demethyl menaquinol} + \text{CO}_2$
- 3) Methyltransferase  
 $2\text{-demethyl menaquinol} + \text{S-adenosyl-L-methionine} \rightarrow \text{menaquinol} + \text{S-adenosyl-L-homocysteine} + \text{H}^+$

The reactions for the respiratory reduction of electron acceptors were constructed in agreement with the following features, (1) the presence of the quinone biosynthetic pathways in the analyzed genome, (2) specificity of the electron acceptor to quinones, and (3) subcellular localization of an active center of the corresponding reductase. For example, the *Bacteroides thetaiotaomicron* genome contains the biosynthesis pathway for MK and 2-demethylmenaquinone (DMK), one aerobic reductase with the cytoplasmic active center, and two anaerobic reductases: a nitrite reductase with an extracellular active center and a fumarate reductase with a cytoplasmic active center. Because oxygen can be reduced with MK, whereas nitrite and fumarate can be reduced with both MK and DMK<sup>28</sup>, the respiratory reduction of electron acceptors in *Bacteroides thetaiotaomicron* is carried out by the following five reactions:

- i. Cyd: aerobic reductase  
 $0.5 \text{O}_2[\text{c}] + \text{menaquinol}[\text{c}] + 2 \text{H}^+[\text{c}] \rightarrow \text{H}_2\text{O}[\text{c}] + \text{menaquinone}[\text{c}] + 2 \text{H}^+[\text{e}]$
- ii. Nrf: nitrite reductase  
 $\text{NO}_2[\text{e}] + 3 \text{menaquinol}[\text{c}] + 2 \text{H}^+[\text{c}] \rightarrow \text{NH}_4^+ + 3 \text{menaquinone}[\text{c}] + \text{H}_2\text{O}[\text{c}]$   
 $\text{NO}_2[\text{e}] + 3 \text{2-demethyl menaquinol}[\text{c}] + 2 \text{H}^+[\text{c}] \rightarrow \text{NH}_4^+ + 3 \text{2-demethyl menaquinone}[\text{c}] + \text{H}_2\text{O}[\text{c}]$
- iii. Frd: fumarate reductase  
 $\text{fumarate}[\text{c}] + \text{menaquinol}[\text{c}] \rightarrow \text{succinate}[\text{c}] + \text{menaquinone}[\text{c}]$   
 $\text{fumarate}[\text{c}] + \text{2-demethyl menaquinol}[\text{c}] \rightarrow \text{succinate}[\text{c}] + \text{2-demethyl menaquinone}[\text{c}]$

Reactions for ATP synthesis via proton-driven ATP synthases were also added to the reconstructions. All analyzed genomes have genes for F-type or V-type ATP synthases. All added respiration, quinone biosynthesis, and ATP synthase reactions are listed in Supplementary Table 16.

### **Supplementary Note 7. Curation of nutrient requirements.**

The *in silico* growth requirements were computed by setting the lower bounds for all exchange reactions to zero individually and predicting if the model could still produce biomass. The analysis revealed essential metabolites for *in silico* growth that are unlikely to be found in the human gut, such as end products of coenzyme biosynthesis, including CoA and NAD(P)H. Bacteria take up precursors of these coenzymes in the form of vitamins, such as pantothenic acid or nicotinic acid. Exchange and transport reactions for vitamins were added where necessary and we ensured that CoA synthesis from pantothenic acid, as well as NADH biosynthesis from nicotinic acid, were unblocked in all metabolic reconstructions. In some cases, a draft reconstructions required dimers or oligomers in the *in silico* growth medium to fulfill a monomer requirement. As it can be expected that uptake of the monomer itself would also satisfy the growth requirement, exchange and transport reactions for the corresponding monomers were added. For example, the galactose-containing oligosaccharides stachyose, melibiose, and lactose were in some cases essential for a model to satisfy its requirement for galactose. Similarly, some draft models depended on dipeptides for certain amino acids, so we enabled the uptake of amino acid monomers.

False negative predictions were resolved in the following ways: (i) for essential nutrients, if they were not yet present in the reconstruction, exchange and transport reactions were added, (ii) for metabolites not included in the biomass reaction, a demand reaction was added for metabolites required *in vitro* and a minimal flux through the demand reaction was enforced, and (iii) for metabolites that were false positives due to gap-filled reactions in the biosynthesis pathways, those gap-filled reactions were removed. False positive predictions were resolved by manually inspecting and gap-filling the corresponding pathways to enable production or consumption of dead-end metabolites. This curation was performed for 244 models.

After curation, 173 false positive predictions remained, which were due to multiple gaps in the networks that could not be resolved without further experimental and genomic evidence. For most of the 219 remaining false negative predictions, the compounds were essential *in vitro* although the biosynthesis pathways were completely annotated in the bacterial genomes. This has been previously observed, e.g., in *Lactobacillus plantarum* WCFS1, and may be explained by feedback inhibition of the biosynthesis pathways *in vitro*<sup>30</sup>.

### **Supplementary Note 8. Metabolite extraction.**

#### ***Short chain fatty acid extraction, derivatization, and GC-MS measurement***

The extraction of short chain fatty acids was based on a protocol from Moreau *et al.*<sup>31</sup>. Briefly, 10  $\mu$ L of the internal standard (2-Ethylbutyric acid,  $c = 200$  mmol/L) were added to 190  $\mu$ L of

medium. After acidification with 10  $\mu\text{L}$  of hydrochloric acid ( $c = 1 \text{ mol/L}$ ), 1 mL of diethyl ether was added and the samples were vortexed for 10 min at 1400 rpm at room temperature (Eppendorf Thermomixer). The upper organic phase was separated by centrifugation (5 min, 21,000  $\text{xg}$ ) and 900  $\mu\text{L}$  were collected in a new reaction tube. Again, 1 mL of diethyl ether were added to the medium, incubated and separated by centrifugation. 900  $\mu\text{L}$  of the organic phase were combined with the first extract. Then, 250  $\mu\text{L}$  were transferred into a GC glass vial with micro insert (5-250  $\mu\text{L}$ ) in triplicates. For derivatization, 25  $\mu\text{L}$  of N-tert-Butyldimethylsilyl-N-methyltrifluoroacetamide with 1% tert-Butyldimethylchlorosilane (MTBSTFA + 1% TBDMSCI, Restek) was added and the samples were incubated for a minimum of 1 hour at room temperature. To determine retention times and evaluate separation efficiency, a Volatile Free Acid Mix (Sigma-Aldrich) including all compounds of interest was prepared, extracted, and derivatized as described before.

GC-MS analysis was performed by using an Agilent 7890A GC coupled to an Agilent 5975C inert XL Mass Selective Detector (Agilent Technologies). A sample volume of 1  $\mu\text{L}$  was injected into a Split/Splitless inlet, operating in split mode (20:1) at 270  $^{\circ}\text{C}$ . The gas chromatograph was equipped with a 20 m (I.D. 180  $\mu\text{m}$ , film 0.18  $\mu\text{m}$ ) DB-1MS capillary column (Agilent J&W GC Column). Helium was used as carrier gas with a constant flow rate of 1.0 ml/min. The GC oven temperature was held at 80  $^{\circ}\text{C}$  for 0.75 min and increased to 150  $^{\circ}\text{C}$  at 15  $^{\circ}\text{C}/\text{min}$ . After 2 min, the temperature was increased at 50  $^{\circ}\text{C}/\text{min}$  to 280  $^{\circ}\text{C}$  and held for 2 min. The total run time was 12.017 min. The transfer line temperature was set to 280  $^{\circ}\text{C}$ . The mass selective detector (MSD) was operating under electron ionization at 70 eV. The MS source was held at 230  $^{\circ}\text{C}$  and the quadrupole at 150  $^{\circ}\text{C}$ . The detector was switched off during elution of MTBSTFA. For quantification, measurements of the compounds of interest were performed in selected ion monitoring mode. Dwell times as well as quantification and qualification ions ( $m/z$ ) are shown in Supplementary Table 20.

#### ***Absolute quantification of medium components using the YSI Biochemistry Analyzer***

Prior to measurement, media samples were filtrated (PHENEX-RC 4mm, 0.2  $\mu\text{m}$ ; Phenomenex) to remove particles. Absolute quantitative values for lactic acid, glutamine, glutamic acid, and glucose were acquired using the 2950D Biochemistry Analyzer (YSI). In addition, for a precise and reliable quantification, external concentration curves for each compound of interest were prepared and measured in triplicate.

#### ***Polar metabolite extraction, derivatization, and GC-MS measurement***

Extracellular metabolites from media samples were extracted in triplicate using ice-cold extraction fluid (5:1 methanol/water, v/v) containing the internal standards [ $U\text{-}^{13}\text{C}$ ]ribitol ( $c = 10 \mu\text{g}/\text{mL}$ ; Omicron Biochemicals, Inc) and pentanedioic acid- $\text{D}_6$  ( $c = 4 \mu\text{g}/\text{mL}$ ; C/D/N Isotopes Inc.). 20  $\mu\text{L}$  of medium was added to 180  $\mu\text{L}$  ice-cold extraction fluid, vortexed for 15 min at 4  $^{\circ}\text{C}$  and 1,400 rpm (Eppendorf Thermomixer), then, centrifuged at 21,000  $\text{xg}$  for 5 min at 4  $^{\circ}\text{C}$ . 50  $\mu\text{L}$  of medium extracts were transferred to GC glass vial with micro insert (5-250  $\mu\text{L}$ ) and evaporated under vacuum to dry at -4  $^{\circ}\text{C}$ . For absolute metabolite quantification, a dilution series of a standard mixture containing all metabolites of interest was included in the extraction procedure and measured in triplicates. Metabolite derivatization was performed by using a multipurpose

sampler (Gerstel). Dried medium extracts were dissolved in 15  $\mu$ l pyridine, containing 20 mg/ml methoxyamine hydrochloride (Sigma-Aldrich), at 55 °C for 90 min under shaking. After adding 15  $\mu$ l MTBSTFA + 1% TBDMSCI (Restek), samples were incubated at 55 °C for 60 min under continuous shaking.

GC-MS analysis was performed by using an Agilent 7890A GC coupled to an Agilent 5975C inert XL Mass Selective Detector (Agilent Technologies). A sample volume of 1  $\mu$ l was injected into a Split/Splitless inlet, operating in split mode (10:1) at 270 °C. The gas chromatograph was equipped with a 30 m (I.D. 250  $\mu$ m, film 0.25  $\mu$ m) DB-35MS capillary column + 5 m DuraGuard column in front of the analytical column (Agilent J&W GC Column). Helium was used as carrier gas with a constant flow rate of 1.0 ml/min. The GC oven temperature was held at 100 °C for 2 min and increased to 300 °C at 10 °C/min and held for 4 min. The total run time was 26 min. The transfer line temperature was set to 280 °C. The MSD was operating under electron ionization at 70 eV. The MS source was held at 230 °C and the quadrupole at 150 °C. For precise quantification, GC-MS measurements of the derivatives of interest were performed in selected ion monitoring mode. Dwell times as well as quantification and qualification ions (m/z) are shown in Supplementary Table 20.

#### ***Data normalization and data processing***

All GC-MS chromatograms were processed using MetaboliteDetector, v3.020151231Ra<sup>32</sup>. The software package supports automatic deconvolution of all mass spectra. Compounds were annotated by retention time and mass spectrum. The internal standards were added at the same concentration to every medium sample to correct for uncontrolled sample losses and analyte degradation during metabolite extraction. The data set was normalized by using the response ratio of the QI\_Analyte and the QI\_Internal Standard (peak area of the analyte divided by the peak area of the internal standard). Absolute concentrations were determined using calibration curves from external standards. To evaluate the variability of independent cultivations, mean values of three technical replicates have been calculated for each biological replicate.

**Supplementary Table 4:** List of tests that the AGORA reconstructions were subjected to evaluate the curation effort. The number of reconstructions that could be curated and number of reconstructions that passed the tests are shown. Several genomes were missing from the PubSEED platform<sup>33</sup> and could thus not be curated based on the comparative genomic analyses (Supplementary Table 2). Similarly, a few organisms were not captured in the literature-driven curation on carbon sources and fermentation pathways (Supplementary Table 1). Less than a third of the AGORA organisms had literature information on essential nutrients (Supplementary Table 1) and were curated based on the available information.

| Test                                                                                                                                                                                                                                                                               | # of reconstructions that could be curated | # of reconstructions that passed the tests                                                             |
|------------------------------------------------------------------------------------------------------------------------------------------------------------------------------------------------------------------------------------------------------------------------------------|--------------------------------------------|--------------------------------------------------------------------------------------------------------|
| Reaction and metabolite nomenclature standardized with VMH database                                                                                                                                                                                                                | 773                                        | 773                                                                                                    |
| Reaction constraints standardized with VMH database                                                                                                                                                                                                                                | 773                                        | 773                                                                                                    |
| Can grow anaerobically                                                                                                                                                                                                                                                             | 773                                        | 773                                                                                                    |
| No metabolites are produced from nothing                                                                                                                                                                                                                                           | 773                                        | 773                                                                                                    |
| ATP production rates from the available carbon sources are feasible                                                                                                                                                                                                                | 773                                        | 773                                                                                                    |
| Metabolite formulas are defined and mass-charge balanced                                                                                                                                                                                                                           | 773                                        | 773                                                                                                    |
| Number of gap-filling reactions that were included for modeling purposes only is minimized                                                                                                                                                                                         | 773                                        | 773                                                                                                    |
| <i>In silico</i> growth rates on the defined diets are in realistic ranges                                                                                                                                                                                                         | 773                                        | 773                                                                                                    |
| Gene-protein-reaction associations and reactions in aerobic and anaerobic respiration, B-vitamin biosynthesis pathways, central carbon metabolism, amino acid biosynthesis and/or pyrimidine and purine biosynthesis determined by a comparative genomics approach are implemented | 612                                        | 612                                                                                                    |
| Carbon source utilization pathways supported by evidence from literature are present and can carry flux                                                                                                                                                                            | 732                                        | 732                                                                                                    |
| Fermentation pathways supported by evidence from literature are present and can carry flux                                                                                                                                                                                         | 765                                        | 765                                                                                                    |
| Species' capabilities/ incapacibilities to synthesize essential biomass precursors are captured                                                                                                                                                                                    | 244                                        | 112 passed all tests, the remaining 132 have one or more false positive or false negative predictions. |

**Supplementary Table 7:** Overview of the comparison of the reaction content between AGORA reconstructions and published reconstructions targeting the same strain. Also shown is the comparison between all 773 AGORA reconstructions and 11 published gut microbe reconstructions that were previously used to construct a simplified gut microbe community model<sup>3</sup>. Eight strains overlapped between both reconstruction collections and were compared directly. Shown is the comparison between the eight overlapping strains individually, and between the pooled reactions of all 11 published and all 773 AGORA reconstructions. recon. = reconstruction.

| Reconstructed Species                           | Total reactions in AGORA recon. | Total reactions in published recon. | Overlapping reactions | Reactions only in AGORA recon. | Reactions only in published recon. | Ref. for published recon. |
|-------------------------------------------------|---------------------------------|-------------------------------------|-----------------------|--------------------------------|------------------------------------|---------------------------|
| <i>Bacteroides thetaiotaomicron</i> VPI 5482    | 1,362                           | 1,528                               | 1058                  | 305                            | 470                                | <sup>4</sup>              |
| <i>Lactobacillus plantarum</i> WCFS1            | 1,213                           | 777                                 | 395                   | 818                            | 382                                | <sup>6</sup>              |
| <i>Streptococcus thermophilus</i> LMG 18311     | 927                             | 556                                 | 327                   | 600                            | 229                                | <sup>5</sup>              |
| <i>Escherichia coli</i> str K 12 substr. MG1655 | 1,786                           | 2,426                               | 853                   | 934                            | 1,573                              | <sup>9</sup>              |
| <i>Escherichia coli</i> O157 H7 str. Sakai      | 1,742                           | 2,372                               | 821                   | 922                            | 1,551                              | <sup>9</sup>              |
| <i>Helicobacter pylori</i> 26695                | 1,014                           | 555                                 | 310                   | 705                            | 245                                | <sup>8</sup>              |
| <i>Klebsiella pneumoniae</i> MGH78578           | 1,801                           | 2,262                               | 843                   | 959                            | 1,419                              | <sup>10</sup>             |
| <i>Salmonella enterica</i> sv. Typhimurium LT2  | 1,765                           | 2,623                               | 847                   | 919                            | 1,776                              | <sup>7</sup>              |
| All reconstructions (11 vs. 773)                | 3,192                           | 4,608                               | 2,066                 | 1,127                          | 1,540                              | <sup>4-10, 34, 35</sup>   |

**Supplementary Table 8:** Subsystem coverage of reactions that are overlapping between curated reconstructions and published reconstructions targeting the same strain. Also shown are differences in subsystem coverage between all 773 reconstructions and 11 published gut microbe reconstructions. Shown is the comparison between the eight overlapping strains individually, and between the pooled reactions of all 11 published and all 773 AGORA reconstructions. For references for the published reconstructions, refer to Supplementary Table 7. PPP = pentose phosphate pathway.

|                                                 |                | Amino acid metabolism | Biomass | Carbohydrate metabolism | Cell wall/ lipopolysaccharide biosynthesis | Central metabolism | Exchange/demand | Fatty acid metabolism | Nitrogen, sulfur, and iron metabolism | Other | PPP and amino sugars | Polysaccharide degradation | Purine and pyrimidine metabolism | Transport | tRNA charging | Vitamin and cofactor biosynthesis |
|-------------------------------------------------|----------------|-----------------------|---------|-------------------------|--------------------------------------------|--------------------|-----------------|-----------------------|---------------------------------------|-------|----------------------|----------------------------|----------------------------------|-----------|---------------|-----------------------------------|
| <i>Bacteroides thetaiotaomicron</i> VPI 5482    | Overlapping    | 151                   | 0       | 28                      | 118                                        | 63                 | 181             | 118                   | 2                                     | 6     | 46                   | 65                         | 100                              | 73        | 0             | 108                               |
|                                                 | AGORA only     | 36                    | 1       | 13                      | 61                                         | 22                 | 34              | 2                     | 1                                     | 7     | 7                    | 3                          | 18                               | 49        | 1             | 49                                |
|                                                 | Published only | 47                    | 1       | 18                      | 59                                         | 22                 | 107             | 13                    | 0                                     | 4     | 12                   | 35                         | 14                               | 104       | 0             | 33                                |
| <i>Lactobacillus plantarum</i> WCFS1            | Overlapping    | 70                    | 0       | 14                      | 17                                         | 38                 | 70              | 1                     | 0                                     | 5     | 25                   | 3                          | 67                               | 41        | 1             | 43                                |
|                                                 | AGORA only     | 82                    | 1       | 23                      | 193                                        | 43                 | 86              | 119                   | 5                                     | 7     | 16                   | 6                          | 51                               | 116       | 0             | 70                                |
|                                                 | Published only | 56                    | 2       | 15                      | 57                                         | 24                 | 44              | 15                    | 6                                     | 7     | 4                    | 0                          | 31                               | 83        | 18            | 20                                |
| <i>Streptococcus thermophilus</i> LMG 18311     | Overlapping    | 69                    | 0       | 11                      | 11                                         | 26                 | 35              | 0                     | 0                                     | 2     | 13                   | 0                          | 82                               | 41        | 1             | 35                                |
|                                                 | AGORA only     | 77                    | 1       | 11                      | 135                                        | 39                 | 73              | 82                    | 2                                     | 8     | 8                    | 1                          | 47                               | 69        | 0             | 46                                |
|                                                 | Published only | 33                    | 1       | 5                       | 52                                         | 16                 | 9               | 17                    | 2                                     | 2     | 3                    | 0                          | 16                               | 40        | 18            | 16                                |
| <i>Escherichia coli</i> str K 12 substr. MG1655 | Overlapping    | 131                   | 0       | 35                      | 133                                        | 89                 | 160             | 45                    | 5                                     | 8     | 44                   | 1                          | 100                              | 0         | 2             | 100                               |
|                                                 | AGORA only     | 93                    | 1       | 14                      | 161                                        | 73                 | 59              | 107                   | 16                                    | 11    | 23                   | 3                          | 58                               | 238       | 0             | 77                                |
|                                                 | Published only | 72                    | 2       | 79                      | 261                                        | 65                 | 146             | 66                    | 37                                    | 15    | 11                   | 1                          | 64                               | 686       | 21            | 47                                |
| <i>Escherichia coli</i> O157 H7 str. Sakai      | Overlapping    | 123                   | 0       | 34                      | 131                                        | 85                 | 151             | 45                    | 5                                     | 7     | 38                   | 1                          | 99                               | 0         | 2             | 100                               |
|                                                 | AGORA only     | 97                    | 1       | 15                      | 160                                        | 72                 | 57              | 107                   | 16                                    | 12    | 18                   | 4                          | 59                               | 227       | 0             | 77                                |
|                                                 | Published only | 72                    | 2       | 75                      | 254                                        | 66                 | 154             | 66                    | 36                                    | 15    | 12                   | 1                          | 65                               | 665       | 21            | 47                                |
| <i>Helicobacter pylori</i> 26695                | Overlapping    | 59                    | 0       | 6                       | 20                                         | 19                 | 55              | 4                     | 0                                     | 2     | 13                   | 0                          | 47                               | 29        | 2             | 54                                |
|                                                 | AGORA only     | 64                    | 1       | 1                       | 208                                        | 38                 | 63              | 111                   | 3                                     | 11    | 11                   | 1                          | 39                               | 82        | 0             | 73                                |
|                                                 | Published only | 39                    | 1       | 5                       | 30                                         | 34                 | 23              | 7                     | 2                                     | 2     | 5                    | 0                          | 21                               | 48        | 0             | 28                                |
|                                                 | Overlapping    | 141                   | 0       | 31                      | 127                                        | 83                 | 144             | 43                    | 4                                     | 10    | 38                   | 1                          | 99                               | 2         | 2             | 111                               |



|                                                |                | Amino acid metabolism | Biomass | Carbohydrate metabolism | Cell wall/ lipopolysaccharide biosynthesis | Central metabolism | Exchange/demand | Fatty acid metabolism | Nitrogen, sulfur, and iron metabolism | Other | PPP and amino sugars | Polysaccharide degradation | Purine and pyrimidine metabolism | Transport | tRNA charging | Vitamin and cofactor biosynthesis |
|------------------------------------------------|----------------|-----------------------|---------|-------------------------|--------------------------------------------|--------------------|-----------------|-----------------------|---------------------------------------|-------|----------------------|----------------------------|----------------------------------|-----------|---------------|-----------------------------------|
| <i>Klebsiella pneumoniae</i> MGH78578          | AGORA only     | 109                   | 1       | 15                      | 165                                        | 73                 | 70              | 101                   | 11                                    | 19    | 23                   | 8                          | 50                               | 227       | 0             | 83                                |
|                                                | Published only | 73                    | 1       | 63                      | 238                                        | 52                 | 149             | 61                    | 12                                    | 12    | 9                    | 1                          | 61                               | 629       | 21            | 44                                |
| <i>Salmonella enterica</i> sv. Typhimurium LT2 | Overlapping    | 131                   | 0       | 33                      | 132                                        | 73                 | 169             | 45                    | 5                                     | 9     | 44                   | 1                          | 100                              | 0         | 2             | 103                               |
|                                                | AGORA only     | 92                    | 1       | 14                      | 160                                        | 79                 | 39              | 107                   | 17                                    | 11    | 23                   | 3                          | 59                               | 213       | 0             | 102                               |
|                                                | Published only | 70                    | 3       | 63                      | 299                                        | 73                 | 198             | 65                    | 59                                    | 18    | 7                    | 1                          | 61                               | 778       | 21            | 60                                |
| All reconstructions (11 vs . 773)              | Overlapping    | 271                   | 0       | 66                      | 286                                        | 163                | 332             | 165                   | 11                                    | 20    | 74                   | 69                         | 149                              | 243       | 2             | 214                               |
|                                                | AGORA only     | 130                   | 1       | 26                      | 85                                         | 134                | 91              | 42                    | 38                                    | 29    | 30                   | 10                         | 50                               | 192       | 0             | 65                                |
|                                                | Published only | 158                   | 12      | 102                     | 443                                        | 115                | 252             | 64                    | 70                                    | 40    | 17                   | 38                         | 83                               | 1,033     | 24            | 88                                |

**Supplementary Table 10:** Cell count per ml, optical density (OD), and pH values before and after cell culture of *Bacteroides caccae* ATCC 43185 (*B. caccae*) and *Lactobacillus rhamnosus* GG ATCC 53103 (LGG). All samples were grown on DMEM 6429 medium supplemented with 1% haemin, 3.33% vitamin K, and 9.4 g/L arabinogalactan.

| Sample              | OD initial (time=0) | OD endpoint | Cell count at endpoint | Time (hours) of culture | pH before | pH after |
|---------------------|---------------------|-------------|------------------------|-------------------------|-----------|----------|
| <i>B.caccae</i> (1) | 0.09                | 0.49        | 2.86E+07               | 31                      | 8.05      | NA       |
| <i>B.caccae</i> (2) | 0.05                | 0.56        | 2.79E+06               | 27                      | 8.05      | 7.16     |
| <i>B.caccae</i> (3) | 0.09                | 0.42        | 3.09E+05               | 27                      | 8.05      | 7.27     |
| LGG (1)             | 0.09                | 0.55        | 5.38E+07               | 31                      | 8.2       | 5.72     |
| LGG (2)             | 0.12                | 0.1         | 1.27E+05               | 48                      | 8.2       | 7.1      |
| LGG (3)             | 0.1                 | 0.14        | 1.76E+05               | 48                      | 8.2       | 6.64     |

**Supplementary Table 11:** Uptake rates (mmol gDW<sup>-1</sup> h<sup>-1</sup>) implemented to simulate DMEM 6429 medium.

| Metabolite ID                    | Exchange reaction ID | Metabolite name  | Uptake rate |
|----------------------------------|----------------------|------------------|-------------|
| <b>Amino acids</b>               |                      |                  |             |
| ala_L                            | EX_ala_L(e)          | L-alanine        | 1           |
| arg_L                            | EX_arg_L(e)          | L-arginine       | 1           |
| asn_L                            | EX_asn_L(e)          | L-asparagine     | 1           |
| asp_L                            | EX_asp_L(e)          | L-aspartate      | 1           |
| cys_L                            | EX_cys_L(e)          | L-cysteine       | 1           |
| gln_L                            | EX_gln_L(e)          | L-glutamine      | 1           |
| glu_L                            | EX_glu_L(e)          | L-glutamate      | 1           |
| gly                              | EX_gly(e)            | Glycine          | 1           |
| his_L                            | EX_his_L(e)          | L-histidine      | 1           |
| ile_L                            | EX_ile_L(e)          | L-isoleucine     | 1           |
| leu_L                            | EX_leu_L(e)          | L-leucine        | 1           |
| lys_L                            | EX_lys_L(e)          | L-lysine         | 1           |
| met_L                            | EX_met_L(e)          | L-methionine     | 1           |
| phe_L                            | EX_phe_L(e)          | L-phenylalanine  | 1           |
| pro_L                            | EX_pro_L(e)          | L-proline        | 1           |
| ser_L                            | EX_ser_L(e)          | L-serine         | 1           |
| thr_L                            | EX_thr_L(e)          | L-threonine      | 1           |
| trp_L                            | EX_trp_L(e)          | L-tryptophan     | 1           |
| tyr_L                            | EX_tyr_L(e)          | L-tyrosine       | 1           |
| val_L                            | EX_val_L(e)          | L-valine         | 1           |
| <b>Carbon sources</b>            |                      |                  |             |
| glc_D                            | EX_glc(e)            | Glucose          | 4.5         |
| pyr                              | EX_pyr(e)            | Pyruvate         | 1           |
| <b>Minerals, vitamins, other</b> |                      |                  |             |
| ca2                              | EX_ca2(e)            | Calcium(2+)      | 1           |
| chol                             | EX_chol(e)           | Choline          | 1           |
| cl                               | EX_cl(e)             | Chloride         | 1           |
| cobalt2                          | EX_cobalt2(e)        | Co2+             | 1           |
| cu2                              | EX_cu2(e)            | Cu2+             | 1           |
| fe2                              | EX_fe2(e)            | Fe2+             | 1           |
| fe3                              | EX_fe3(e)            | Fe3+             | 1           |
| fol                              | EX_fol(e)            | Folate           | 1           |
| k                                | EX_k(e)              | Potassium        | 1           |
| h2o                              | EX_h2o(e)            | Water            | 10          |
| h2s                              | EX_h2s(e)            | Hydrogen sulfide | 1           |
| inost                            | EX_inost(e)          | Inositol         | 1           |

| Metabolite ID                                                                             | Exchange reaction ID | Metabolite name       | Uptake rate |
|-------------------------------------------------------------------------------------------|----------------------|-----------------------|-------------|
| mg2                                                                                       | EX_mg2(e)            | Magnesium             | 1           |
| mn2                                                                                       | EX_mn2(e)            | Manganese             | 1           |
| ncam                                                                                      | EX_ncam(e)           | Nicotinamide          | 1           |
| pi                                                                                        | EX_pi(e)             | Hydrogenphosphate     | 10          |
| pnto_R                                                                                    | EX_pnto_R(e)         | Pantothenate          | 1           |
| pydxn                                                                                     | EX_pydxn(e)          | Pyridoxine            | 1           |
| ribflv                                                                                    | EX_ribflv(e)         | Riboflavin            | 1           |
| so4                                                                                       | EX_so4(e)            | Sulfate               | 1           |
| thm                                                                                       | EX_thm(e)            | Thiamin               | 1           |
| zn2                                                                                       | EX_zn2(e)            | Zinc                  | 1           |
| <b>Supplemented nutrients (based on experimental procedure, see Supplementary Note 8)</b> |                      |                       |             |
| mqn7                                                                                      | EX_mqn7(e)           | Menaquinone 7         | 1           |
| mqn8                                                                                      | EX_mqn8(e)           | Menaquinone 8         | 1           |
| pHEME                                                                                     | EX_pHEME(e)          | Protoheme             | 1           |
| arabinogal                                                                                | EX_arabinogal(e)     | Larch arabinogalactan | 0.0094      |
| <b>Metabolites required <i>in silico</i></b>                                              |                      |                       |             |
| q8                                                                                        | EX_q8(e)             | Ubiquinone-8          | 1           |
| sheme                                                                                     | EX_sheme(e)          | Siroheme              | 1           |

**Supplementary Table 12:** Uptake rates (mmol gDW<sup>-1</sup> h<sup>-1</sup>) for dietary compounds implemented to simulate Western and high fiber diet.

| Metabolite ID | Exchange reaction ID | Metabolite name                | Western Diet | High fiber Diet |
|---------------|----------------------|--------------------------------|--------------|-----------------|
| <b>Sugars</b> |                      |                                |              |                 |
| arab_L        | EX_arab_L(e)         | L-arabinose                    | 0.17878295   | 0.04736842      |
| cellb         | EX_cellb(e)          | Cellobiose                     | 0.07449289   | 0.01973684      |
| drib          | EX_drib(e)           | 2-deoxy-D-ribose               | 0.17878295   | 0.04736842      |
| fru           | EX_fru(e)            | D-Fructose                     | 0.14898579   | 0.03947368      |
| fuc_L         | EX_fuc_L(e)          | L-fucose                       | 0.14898579   | 0.03947368      |
| gal           | EX_gal(e)            | D-Galactose                    | 0.14898579   | 0.03947368      |
| glc_D         | EX_glc(e)            | D-glucose                      | 0.14898579   | 0.03947368      |
| glcn          | EX_glc(e)            | D-gluconate                    | 0.14898579   | 0.03947368      |
| lcts          | EX_lcts(e)           | Lactose                        | 0.07449289   | 0.01973684      |
| malt          | EX_malt(e)           | Maltose                        | 0.07449289   | 0.01973684      |
| man           | EX_man(e)            | D-Mannose                      | 0.14898579   | 0.03947368      |
| melib         | EX_melib(e)          | Melibiose                      | 0.07449289   | 0.01973684      |
| mnl           | EX_mnl(e)            | D-Mannitol                     | 0.14898579   | 0.03947368      |
| oxa           | EX_oxa(e)            | Oxalate(2-)                    | 0.44695737   | 0.11842105      |
| rib_D         | EX_rib_D(e)          | D-ribose                       | 0.17878295   | 0.04736842      |
| rmn           | EX_rmn(e)            | L-Rhamnose                     | 0.14898579   | 0.03947368      |
| sucr          | EX_sucr(e)           | Sucrose                        | 0.07449289   | 0.01973684      |
| tre           | EX_tre(e)            | Trehalose                      | 0.07449289   | 0.01973684      |
| xyl_D         | EX_xyl_D(e)          | D-xylose                       | 0.17878295   | 0.04736842      |
| strch1        | EX_strch1(e)         | Starch                         | 0.25733909   | 0.06818182      |
| <b>Fiber</b>  |                      |                                |              |                 |
| amylopect900  | EX_amylopect900(e)   | Amylopectin                    | 0.00001567   | 0.00034722      |
| amylose300    | EX_amylose300(e)     | Amylose                        | 0.00004702   | 0.00104167      |
| arabinan101   | EX_arabinan101(e)    | Arabinan                       | 0.00016628   | 0.00368369      |
| arabinogal    | EX_arabinogal(e)     | Larch arabinogalactan          | 0.00002191   | 0.00048550      |
| arabinoxyl    | EX_arabinoxyl(e)     | Arabinoxylan                   | 0.00030665   | 0.00679348      |
| bglc          | EX_bglc(e)           | Beta-glucan                    | 0.00000007   | 0.00000156      |
| cellul        | EX_cellul(e)         | Cellulose                      | 0.00002821   | 0.00062500      |
| dextran40     | EX_dextran40(e)      | Dextran 40, 1,6-alpha-D-Glucan | 0.00017632   | 0.00390625      |
| galmannan     | EX_galmannan(e)      | Carob galactomannan            | 0.00001411   | 0.00031250      |
| glcmannan     | EX_glcmannan(e)      | Konjac glucomannan             | 0.00003288   | 0.00072844      |
| homogal       | EX_homogal(e)        | Homogalacturonan               | 0.00012823   | 0.00284091      |
| inulin        | EX_inulin(e)         | Chicory inulin                 | 0.00047019   | 0.01041667      |
| kestopt       | EX_kestopt(e)        | Kestopentaose                  | 0.00282117   | 0.06250000      |
| levan1000     | EX_levan1000(e)      | Levan, 1000 fructose units     | 0.00001411   | 0.00031250      |

| Metabolite ID  | Exchange reaction ID | Metabolite name              | Western Diet | High fiber Diet |
|----------------|----------------------|------------------------------|--------------|-----------------|
| lichn          | EX_lichn(e)          | Lichenin from Icelandic moss | 0.00008298   | 0.00183824      |
| lmn30          | EX_lmn30(e)          | Laminarin                    | 0.00047019   | 0.01041667      |
| pect           | EX_pect(e)           | Pectin                       | 0.00003339   | 0.00073964      |
| pullulan1200   | EX_pullulan1200(e)   | Pullulan                     | 0.00001175   | 0.00026042      |
| raffin         | EX_raffin(e)         | Raffinose                    | 0.00470194   | 0.10416667      |
| rhamnogalurl   | EX_rhamnogalurl(e)   | Potato rhamnogalacturonan I  | 0.00001449   | 0.00032106      |
| rhamnogalurlII | EX_rhamnogalurlII(e) | Wine rhamnogalacturonan II   | 0.00026699   | 0.00591483      |
| starch1200     | EX_starch1200(e)     | Resistant starch             | 0.00001175   | 0.00026042      |
| xylan          | EX_xylan(e)          | Oat spelt xylan              | 0.00003206   | 0.00071023      |
| xyluglc        | EX_xyluglc(e)        | Xyluglucan                   | 0.00001315   | 0.00029124      |
| <b>Fat</b>     |                      |                              |              |                 |
| arachd         | EX_arachd(e)         | Arachidonate                 | 0.00332813   | 0.00166406      |
| chsterol       | EX_chsterol(e)       | Cholesterol                  | 0.00495795   | 0.00247898      |
| glyc           | EX_glyc(e)           | Glycerol                     | 1.79965486   | 0.89982743      |
| hdca           | EX_hdca(e)           | Hexadecanoate (n-C16:0)      | 0.39637090   | 0.19818545      |
| hdcea          | EX_hdcea(e)          | Hexadecenoate (n-C16:1)      | 0.03651697   | 0.01825848      |
| lnlc           | EX_lnlc(e)           | Linoleate                    | 0.35910921   | 0.17955461      |
| lnlnca         | EX_lnlnc(a)          | Alpha-linolenate             | 0.01756512   | 0.00878256      |
| lnlncg         | EX_lnlncg(e)         | Gamma-linolenate             | 0.01756512   | 0.00878256      |
| ocdca          | EX_ocdca(e)          | Octadecanoate (n-C18:0)      | 0.16928260   | 0.08464130      |
| ocdcea         | EX_ocdcea(e)         | Octadecenoate (n-C18:1)      | 0.68144465   | 0.34072233      |
| octa           | EX_octa(e)           | Octanoate (n-C8:0)           | 0.01294272   | 0.00647136      |
| ttdca          | EX_ttdca(e)          | Tetradecanoate (n-C14:0)     | 0.06867567   | 0.03433784      |
| <b>Protein</b> |                      |                              |              |                 |
| ala_L          | EX_ala_L(e)          | L-alanine                    | 1            | 1               |
| arg_L          | EX_arg_L(e)          | L-arginine                   | 0.15         | 0.15            |
| asn_L          | EX_asn_L(e)          | L-asparagine                 | 0.225        | 0.225           |
| asp_L          | EX_asp_L(e)          | L-aspartate                  | 0.225        | 0.225           |
| cys_L          | EX_cys_L(e)          | L-cysteine                   | 1            | 1               |
| gln_L          | EX_gln_L(e)          | L-glutamine                  | 0.18         | 0.18            |
| glu_L          | EX_glu_L(e)          | L-glutamate                  | 0.18         | 0.18            |
| gly            | EX_gly(e)            | Glycine                      | 0.45         | 0.45            |
| his_L          | EX_his_L(e)          | L-histidine                  | 0.15         | 0.15            |
| ile_L          | EX_ile_L(e)          | L-isoleucine                 | 0.15         | 0.15            |
| leu_L          | EX_leu_L(e)          | L-leucine                    | 0.15         | 0.15            |
| lys_L          | EX_lys_L(e)          | L-lysine                     | 0.15         | 0.15            |
| met_L          | EX_met_L(e)          | L-methionine                 | 0.18         | 0.18            |

| Metabolite ID                    | Exchange reaction ID | Metabolite name                                  | Western Diet | High fiber Diet |
|----------------------------------|----------------------|--------------------------------------------------|--------------|-----------------|
| phe_L                            | EX_phe_L(e)          | L-phenylalanine                                  | 1            | 1               |
| pro_L                            | EX_pro_L(e)          | L-proline                                        | 0.18         | 0.18            |
| ser_L                            | EX_ser_L(e)          | L-serine                                         | 1            | 1               |
| thr_L                            | EX_thr_L(e)          | L-threonine                                      | 0.225        | 0.225           |
| trp_L                            | EX_trp_L(e)          | L-tryptophan                                     | 0.08181818   | 0.08181818      |
| tyr_L                            | EX_tyr_L(e)          | L-tyrosine                                       | 1            | 1               |
| val_L                            | EX_val_L(e)          | L-valine                                         | 0.18         | 0.18            |
| <b>Minerals, vitamins, other</b> |                      |                                                  |              |                 |
| 12dgr180                         | EX_12dgr180(e)       | 1,2-Diacyl-sn-glycerol (dioctadecanoyl, n-C18:0) | 1            | 1               |
| 26dap_M                          | EX_26dap_M(e)        | meso-2,6-Diaminoheptanedioate                    | 1            | 1               |
| 2dmmq8                           | EX_2dmmq8(e)         | 2-Demethylmenaquinone 8                          | 1            | 1               |
| 2obut                            | EX_2obut(e)          | 2-Oxobutanoate                                   | 1            | 1               |
| 3mop                             | EX_3mop(e)           | 3-methyl-2-oxopentanoate                         | 1            | 1               |
| 4abz                             | EX_4abz(e)           | 4-Aminobenzoate                                  | 1            | 1               |
| 4hbz                             | EX_4hbz(e)           | 4-hydroxybenzoate                                | 1            | 1               |
| ac                               | EX_ac(e)             | Acetate                                          | 1            | 1               |
| acgam                            | EX_acgam(e)          | N-acetyl-D-glucosamine                           | 1            | 1               |
| acmana                           | EX_acmana(e)         | N-acetyl-D-mannosamine                           | 1            | 1               |
| acnam                            | EX_acnam(e)          | N-acetylneuraminate                              | 1            | 1               |
| ade                              | EX_ade(e)            | Adenine                                          | 1            | 1               |
| adn                              | EX_adn(e)            | Adenosine                                        | 1            | 1               |
| adocbl                           | EX_adocbl(e)         | Adenosylcobalamin                                | 1            | 1               |
| ala_D                            | EX_ala_D(e)          | D-alanine                                        | 1            | 1               |
| amp                              | EX_amp(e)            | AMP                                              | 1            | 1               |
| arab_D                           | EX_arab_D(e)         | D-Arabinose                                      | 1            | 1               |
| btn                              | EX_btn(e)            | Biotin                                           | 1            | 1               |
| ca2                              | EX_ca2(e)            | Calcium(2+)                                      | 1            | 1               |
| cbl1                             | EX_cbl1(e)           | Cob(II)alamin                                    | 1            | 1               |
| cgly                             | EX_cgly(e)           | L-cysteinylglycine                               | 1            | 1               |
| chol                             | EX_chol(e)           | Choline                                          | 1            | 1               |
| chor                             | EX_chor(e)           | Chorismate                                       | 1            | 1               |
| cit                              | EX_cit(e)            | Citrate                                          | 1            | 1               |
| cl                               | EX_cl(e)             | Chloride                                         | 1            | 1               |
| cobalt2                          | EX_cobalt2(e)        | Co2+                                             | 1            | 1               |
| csn                              | EX_csn(e)            | Cytosine                                         | 1            | 1               |
| cu2                              | EX_cu2(e)            | Cu2+                                             | 1            | 1               |

| Metabolite ID | Exchange reaction ID | Metabolite name        | Western Diet | High fiber Diet |
|---------------|----------------------|------------------------|--------------|-----------------|
| dad_2         | EX_dad_2(e)          | 2-deoxyadenosine       | 1            | 1               |
| dcyt          | EX_dcyt(e)           | Deoxycytidine          | 1            | 1               |
| ddca          | EX_ddca(e)           | Laurate                | 1            | 1               |
| dgsn          | EX_dgsn(e)           | Deoxyguanosine         | 1            | 1               |
| fe2           | EX_fe2(e)            | Fe <sup>2+</sup>       | 1            | 1               |
| fe3           | EX_fe3(e)            | Fe <sup>3+</sup>       | 1            | 1               |
| fe3dcit       | EX_fe3dcit(e)        | Fe(III)dicitrate       | 1            | 1               |
| fald          | EX_fald(e)           | Formaldehyde           | 1            | 1               |
| fol           | EX_fol(e)            | Folate                 | 1            | 1               |
| for           | EX_for(e)            | Formate                | 1            | 1               |
| fum           | EX_fum(e)            | Fumarate               | 1            | 1               |
| gam           | EX_gam(e)            | D-Glucosamine          | 1            | 1               |
| glu_D         | EX_glu_D(e)          | D-Glutamate            | 1            | 1               |
| glyc3p        | EX_glyc3p(e)         | Glycerol 3-phosphate   | 1            | 1               |
| gthox         | EX_gthox(e)          | Oxidized glutathione   | 1            | 1               |
| gthrd         | EX_gthrd(e)          | Reduced glutathione    | 1            | 1               |
| gua           | EX_gua(e)            | Guanine                | 1            | 1               |
| h             | EX_h(e)              | Proton                 | 1            | 1               |
| H2            | EX_h2(e)             | Hydrogen               | 1            | 1               |
| h2o           | EX_h2o(e)            | Water                  | 10           | 10              |
| h2s           | EX_h2s(e)            | Hydrogen sulfide       | 1            | 1               |
| hxan          | EX_hxan(e)           | Hypoxanthine           | 1            | 1               |
| indole        | EX_indole(e)         | Indole                 | 1            | 1               |
| k             | EX_k(e)              | Potassium              | 1            | 1               |
| lanost        | EX_lanost(e)         | lanosterol             | 1            | 1               |
| meoh          | EX_meoh(e)           | Methanol               | 10           | 10              |
| metsox_S_L    | EX_metsox_S_L(e)     | L-Methionine Sulfoxide | 1            | 1               |
| mg2           | EX_mg2(e)            | Magnesium              | 1            | 1               |
| mn2           | EX_mn2(e)            | Mn <sup>2+</sup>       | 1            | 1               |
| mobd          | EX_mobd(e)           | Molybdate              | 1            | 1               |
| mqn7          | EX_mqn7(e)           | Menaquinone 7          | 1            | 1               |
| mqn8          | EX_mqn8(e)           | Menaquinone 8          | 1            | 1               |
| na1           | EX_na1(e)            | Sodium                 | 1            | 1               |
| nac           | EX_nac(e)            | Nicotinate             | 1            | 1               |
| ncam          | EX_ncam(e)           | Nicotinamide           | 1            | 1               |
| nmn           | EX_nmn(e)            | NMN                    | 1            | 1               |
| no2           | EX_no2(e)            | Nitrite                | 1            | 1               |
| no3           | EX_no3(e)            | Nitrate                | 1            | 1               |
| orn           | EX_orn(e)            | Ornithine              | 1            | 1               |
| pheme         | EX_pheme(e)          | Protoheme              | 1            | 1               |



| Metabolite ID | Exchange reaction ID | Metabolite name       | Western Diet | High fiber Diet |
|---------------|----------------------|-----------------------|--------------|-----------------|
| pi            | EX_pi(e)             | Hydrogenphosphate     | 1            | 1               |
| pime          | EX_pime(e)           | Pimelate              | 1            | 1               |
| pnto_R        | EX_pnto_R(e)         | (R)-Pantothenate      | 1            | 1               |
| ptrc          | EX_ptrc(e)           | Putrescine            | 1            | 1               |
| pydam         | EX_pydam(e)          | Pyridoxamine          | 1            | 1               |
| pydx          | EX_pydx(e)           | Pyridoxal             | 1            | 1               |
| pydx5p        | EX_pydx5p(e)         | Pyridoxal 5-phosphate | 1            | 1               |
| pydxn         | EX_pydxn(e)          | Pyridoxine            | 1            | 1               |
| q8            | EX_q8(e)             | Ubiquinone-8          | 1            | 1               |
| ribflv        | EX_ribflv(e)         | Riboflavin            | 1            | 1               |
| sel           | EX_sel(e)            | Selenate              | 1            | 1               |
| sheme         | EX_sheme(e)          | Siroheme              | 1            | 1               |
| so4           | EX_so4(e)            | Sulfate               | 1            | 1               |
| spmd          | EX_spmd(e)           | Spermidine            | 1            | 1               |
| thm           | EX_thm(e)            | Thiamin               | 1            | 1               |
| thymd         | EX_thymd(e)          | Thymidine             | 1            | 1               |
| ura           | EX_ura(e)            | Uracil                | 1            | 1               |
| uri           | EX_uri(e)            | Uridine               | 1            | 1               |
| xan           | EX_xan(e)            | Xanthine              | 1            | 1               |
| zn2           | EX_zn2(e)            | Zinc                  | 1            | 1               |

**Supplementary Table 17:** Reactions associated with functional roles of the eight different B-vitamin biosynthesis pathways. The functional roles involved in the eight B-vitamin biosynthesis pathways are the same as described in a study by Magnusdottir et al. <sup>14</sup>.

| <b>B-vitamin</b> | <b>Functional role</b> | <b>VMH Reaction(s)</b>                                                                    |
|------------------|------------------------|-------------------------------------------------------------------------------------------|
| <b>Biotin</b>    | BioH / BioG            | PMACPME                                                                                   |
|                  | BioW                   | EX_pime(e), PIMEtr                                                                        |
|                  | BioC                   | ACS, ACCOAC, MACPMT, MALCOACD, 3OACPR1, 3HACPR1, EACPR1, GACPCD, 3OACPR2, 3HACPR2, EACPR2 |
|                  | BioF                   | AOXSr2                                                                                    |
|                  | BioA                   | AMAOTr                                                                                    |
|                  | BioD                   | DBTS                                                                                      |
|                  | BioB                   | BTS4                                                                                      |
| <b>Cobalamin</b> | CysG / CbiKX           | SHCHCC                                                                                    |
|                  | CbiL                   | CPC2MT                                                                                    |
|                  | CbiG                   | CPC3MT                                                                                    |
|                  | CbiF                   | CPC4MT                                                                                    |
|                  | CobF                   | CPC5MT                                                                                    |
|                  | CbiJ                   | CPC6R                                                                                     |
|                  | CbiE / CbiT            | CPC6MT                                                                                    |
|                  | CbiC                   | CPC8MM                                                                                    |
|                  | CbiA                   | CYRDAS                                                                                    |
|                  | CobAT                  | CYRDAR, CYRDAAT                                                                           |
|                  | CbiP                   | ADCYRS                                                                                    |
|                  | CbiB                   | ADCPS2                                                                                    |
|                  | CobU                   | ACBIPGT                                                                                   |
|                  | CobS                   | ADOCBLS                                                                                   |
| <b>Folate</b>    | FolE1 / FolE2          | GTPCI                                                                                     |
|                  | folQ2 / folQ3          | DNTPPA                                                                                    |
|                  | FolB / ptpS-III        | DHNPA2                                                                                    |
|                  | FolK                   | HPPK2                                                                                     |
|                  | FolP                   | DHPS2                                                                                     |
|                  | pabAc / pabAb          | ADCS                                                                                      |
|                  | pabAa                  | ADCL                                                                                      |
|                  | FolCDHFS               | DHFS                                                                                      |
|                  | FolCFPGS / FolC2       | FPGS                                                                                      |
|                  | Dhfr0 / Dhfr1 / Dhfr2  | DHFR                                                                                      |
| <b>Niacin</b>    | ASPOX                  | ASPO7                                                                                     |
|                  | ASPDH                  | ASPO2                                                                                     |
|                  | QSYN                   | QULNS                                                                                     |
|                  | QAPRT                  | NNDPR                                                                                     |
|                  | NaMNAT_D               | NNATr                                                                                     |
|                  | NADS                   | NADS1                                                                                     |

|                     |                           |                   |
|---------------------|---------------------------|-------------------|
|                     | NMNS                      | R0527             |
|                     | NMNAT / NMNAT_R / NMNAT_M | NMNAT             |
|                     | NADK                      | NADK              |
| <b>Pantothenate</b> | ASPDC                     | ASP1DC            |
|                     | KPHMT                     | MOHMT             |
|                     | KPRED / KARED             | DPR               |
|                     | PBAL                      | PANTS             |
|                     | PANK / PANK2 / PANK3      | PNTK              |
|                     | PPCS                      | PPNCL3            |
|                     | PPCDC                     | PPCDC             |
|                     | PPAT                      | PTPAT             |
|                     | DPCCK                     | DPCOAK            |
| <b>Pyridoxine</b>   | PdxT / PdxS               | PLPS              |
|                     | Dxs                       | DXPS              |
|                     | gapA                      | E4PD              |
|                     | PdxB                      | PERD              |
|                     | PdxF / PdxA               | OHPBAT            |
|                     | PdxJ                      | PDX5PS            |
|                     | PdxH                      | PDX5PO2, PYAM5POr |
| <b>Riboflavin</b>   | GTPCH2                    | GTPCII2           |
|                     | PyrD / PyrD-a             | DHPPDA2           |
|                     | PyrR                      | APRAUR            |
|                     | PyrP                      | PMDPHT            |
|                     | DHBPS                     | DB4PS             |
|                     | DMRLS                     | RBFSa             |
|                     | RS Ae / RSAalpha          | RBFSb             |
|                     | RK                        | RBFK              |
|                     | FMNAT                     | FMNAT             |
| <b>Thiamin</b>      | ThiG                      | THZPSN            |
|                     | ThiC                      | AMPMS2            |
|                     | ThiD / ThiD_alt           | PMPK, HMPK1       |
|                     | TMP-Pase(ThiE)            | TMPPP             |

**Supplementary Table 20:** GC-MS dwell times and quantification and qualification ions (m/z) for the measured short-chain fatty acids and amino acids.

| Derivatives                           | Quant-Ion (m/z) | Qual-Ion (m/z) | Qual-Ion (m/z) | Dwell Time (ms) |
|---------------------------------------|-----------------|----------------|----------------|-----------------|
| <b><i>Short-chain fatty acids</i></b> |                 |                |                |                 |
| Formic acid 1TBDMS                    | 103.0           | 75.0           | 99.0           | 20              |
| Acetic acid 1TBDMS                    | 117.0           | 75.0           | 99.0           | 20              |
| Butyric acid 1TBDMS                   | 145.1           | 75.0           | 115.1          | 20              |
| Isobutyric acid 1TBDMS                | 145.1           | 75.0           | 115.1          | 20              |
| Valeric acid 1TBDMS                   | 159.1           | 75.0           | 201.1          | 20              |
| IS 2-Ethylbutyric acid 1TBDMS         | 173.1           | 75.0           | 115.1          | 20              |
| 4-Methylvaleric acid 1TBDMS           | 173.1           | 75.0           | 215.1          | 20              |
| Hexanoic acid 1TBDMS                  | 173.1           | 75.0           | 131.0          | 20              |
| <b><i>Polar metabolites</i></b>       |                 |                |                |                 |
| Alanine 2TBDMS                        | 260.2           | 158.1          | 232.1          | 70              |
| Glycine 2TBDMS                        | 246.1           | 189.1          | 218.1          | 50              |
| Valine 2TBDMS                         | 288.6           | 186.1          | 260.2          | 70              |
| Leucine 2TBDMS                        | 302.2           | 200.2          | 274.2          | 70              |
| Isoleucine 2TBDMS                     | 302.2           | 200.2          | 274.2          | 70              |
| Threonine 2TBDMS                      | 290.2           | 159.1          | 303.2          | 50              |
| Proline 2TBDMS                        | 286.2           | 184.1          | 258.2          | 50              |
| Succinic acid 2TBDMS                  | 289.1           | 215.1          | 331.2          | 50              |
| IS Glutaric acid-D6 2TBDMS            | 309.2           | 235.2          | 351.3          | 70              |
| Serine 3TBDMS                         | 390.2           | 302.2          | 362.2          | 50              |
| Threonine 3TBDMS                      | 404.2           | 376.3          | 417.3          | 70              |
| Methionine 2TBDMS                     | 320.2           | 218.1          | 292.2          | 50              |
| Malic acid 3TBDMS                     | 419.2           | 287.1          | 403.2          | 50              |
| Phenylalanine 2TBDMS                  | 336.2           | 308.2          | combined       | 50              |
| Aspartic acid 3TBDMS                  | 418.2           | 316.2          | (coeluting)    |                 |
| Ornithine 3TBDMS                      | 474.4           | 184.1          | 286.2          | 50              |
| Glutamic acid_3TBDMS                  | 432.3           | 330.2          | 404.3          | 50              |
| Lysine 3TBDMS                         | 431.3           | 300.2          | 488.4          | 70              |
| Tyrosine 3TBDMS                       | 466.3           | 302.2          | 438.3          | 50              |
| Histidine 3TBDMS                      | 440.3           | 338.3          | 196.1          | 70              |

## Supplementary References

1. Noor, E., Haraldsdottir, H.S., Milo, R. & Fleming, R.M. Consistent estimation of Gibbs energy using component contributions. *PLoS Comput Biol* **9**, e1003098 (2013).
2. Fallingborg, J. Intraluminal pH of the human gastrointestinal tract. *Danish medical bulletin* **46**, 183-196 (1999).
3. Heinken, A. & Thiele, I. Systematic prediction of health-relevant human-microbial co-metabolism through a computational framework. *Gut Microbes* (2015).
4. Heinken, A., Sahoo, S., Fleming, R.M. & Thiele, I. Systems-level characterization of a host-microbe metabolic symbiosis in the mammalian gut. *Gut microbes* **4**, 28-40 (2013).
5. Pastink, M.I. et al. Genome-scale model of *Streptococcus thermophilus* LMG18311 for metabolic comparison of lactic acid bacteria. *Appl Environ Microbiol* **75**, 3627-3633 (2009).
6. Teusink, B. et al. Analysis of growth of *Lactobacillus plantarum* WCFS1 on a complex medium using a genome-scale metabolic model. *The Journal of biological chemistry* **281**, 40041-40048 (2006).
7. Thiele, I. et al. A community effort towards a knowledge-base and mathematical model of the human pathogen *Salmonella Typhimurium* LT2. *BMC systems biology* **5**, 8 (2011).
8. Thiele, I., Vo, T.D., Price, N.D. & Palsson, B.O. Expanded metabolic reconstruction of *Helicobacter pylori* (iIT341 GSM/GPR): an in silico genome-scale characterization of single- and double-deletion mutants. *Journal of bacteriology* **187**, 5818-5830 (2005).
9. Baumler, D.J., Peplinski, R.G., Reed, J.L., Glasner, J.D. & Perna, N.T. The evolution of metabolic networks of *E. coli*. *BMC systems biology* **5**, 182 (2011).
10. Liao, Y.C. et al. An experimentally validated genome-scale metabolic reconstruction of *Klebsiella pneumoniae* MGH 78578, iYL1228. *Journal of bacteriology* **193**, 1710-1717 (2011).
11. Thiele, I. et al. A community-driven global reconstruction of human metabolism. *Nature biotechnology* **31**, 419-425 (2013).
12. Feist, A.M. et al. A genome-scale metabolic reconstruction for *Escherichia coli* K-12 MG1655 that accounts for 1260 ORFs and thermodynamic information. *Molecular systems biology* **3**, 121 (2007).
13. Thiele, I. & Palsson, B.O. A protocol for generating a high-quality genome-scale metabolic reconstruction. *Nature protocols* **5**, 93-121 (2010).
14. Magnusdottir, S., Ravcheev, D., de Crecy-Lagard, V. & Thiele, I. Systematic genome assessment of B-vitamin biosynthesis suggests co-operation among gut microbes. *Front Genet* **6**, 148 (2015).
15. Macfarlane, G.T. & Macfarlane, S. Bacteria, colonic fermentation, and gastrointestinal health. *Journal of AOAC International* **95**, 50-60 (2012).
16. Krieg, N.R. *Bergey's manual of systematic bacteriology*, 2nd ed., volume 4. (Springer, New York; 2010).
17. Rey, F.E. et al. Dissecting the in vivo metabolic potential of two human gut acetogens. *The Journal of biological chemistry* **285**, 22082-22090 (2010).
18. Reichardt, N. et al. Phylogenetic distribution of three pathways for propionate production within the human gut microbiota. *The ISME journal* **8**, 1323-1335 (2014).
19. Vital, M., Howe, A.C. & Tiedje, J.M. Revealing the bacterial butyrate synthesis pathways by analyzing (meta)genomic data. *mBio* **5**, e00889 (2014).
20. Samuel, B.S. et al. Genomic and metabolic adaptations of *Methanobrevibacter smithii* to the human gut. *P Natl Acad Sci USA* **104**, 10643-10648 (2007).
21. Rey, F.E. et al. Metabolic niche of a prominent sulfate-reducing human gut bacterium. *Proceedings of the National Academy of Sciences of the United States of America* **110**, 13582-13587 (2013).

22. Davila, A.M. et al. Re-print of "Intestinal luminal nitrogen metabolism: role of the gut microbiota and consequences for the host". *Pharmacological research* **69**, 114-126 (2013).
23. Flint, H.J. The impact of nutrition on the human microbiome. *Nutrition reviews* **70 Suppl 1**, S10-13 (2012).
24. Flint, H.J., Scott, K.P., Duncan, S.H., Louis, P. & Forano, E. Microbial degradation of complex carbohydrates in the gut. *Gut microbes* **3**, 289-306 (2012).
25. Huynen, M.A., Dandekar, T. & Bork, P. Variation and evolution of the citric-acid cycle: a genomic perspective. *Trends in microbiology* **7**, 281-291 (1999).
26. Ravcheev, D.A. & Thiele, I. Systematic genomic analysis reveals the complementary aerobic and anaerobic respiration capacities of the human gut microbiota. *Front Microbiol* **5**, 674 (2014).
27. Nowicka, B. & Kruk, J. Occurrence, biosynthesis and function of isoprenoid quinones. *Biochim Biophys Acta* **1797**, 1587-1605 (2010).
28. Wissenbach, U., Ternes, D. & Unden, G. An *Escherichia coli* mutant containing only demethylmenaquinone, but no menaquinone: effects on fumarate, dimethylsulfoxide, trimethylamine N-oxide and nitrate respiration. *Archives of microbiology* **158**, 68-73 (1992).
29. Zhi, X.Y. et al. The futasol pathway played an important role in menaquinone biosynthesis during early prokaryote evolution. *Genome Biol Evol* **6**, 149-160 (2014).
30. Teusink, B. et al. In silico reconstruction of the metabolic pathways of *Lactobacillus plantarum*: comparing predictions of nutrient requirements with those from growth experiments. *Appl Environ Microbiol* **71**, 7253-7262 (2005).
31. Moreau, N.M. et al. Simultaneous measurement of plasma concentrations and <sup>13</sup>C-enrichment of short-chain fatty acids, lactic acid and ketone bodies by gas chromatography coupled to mass spectrometry. *J Chromatogr B Analyt Technol Biomed Life Sci* **784**, 395-403 (2003).
32. Hiller, K. et al. MetaboliteDetector: comprehensive analysis tool for targeted and nontargeted GC/MS based metabolome analysis. *Analytical chemistry* **81**, 3429-3439 (2009).
33. Aziz, R.K. et al. SEED servers: high-performance access to the SEED genomes, annotations, and metabolic models. *PLoS One* **7**, e48053 (2012).
34. Heinken, A. et al. A functional metabolic map of *Faecalibacterium prausnitzii*, a beneficial human gut microbe. *J Bacteriol* (2014).
35. Flahaut, N.A. et al. Genome-scale metabolic model for *Lactococcus lactis* MG1363 and its application to the analysis of flavor formation. *Applied microbiology and biotechnology* **97**, 8729-8739 (2013).
